# Supplementary material for: Comparison of the ChatGPT and DeepSeek models in responding to multiple choice questions related to rehabilitation of completely edentulous patients with complete dentures
Source: Research Square preprint supplement (doi:10.21203/rs.3.rs-8186095/v1), 2025-12-30
Supplement: Supplementary file 1 [file 2ad337f3e3bf8e327cac163b.docx]

**MCQs with the Responses from ChatGPT and DeepSeek**

1. Which of the following is the sign of burning mouth syndrome?
2. Ulcer.
3. Inflamed area.
4. Tissue hyperplasia.
5. **Burning mouth syndrome has no apparent clinical sign.**

Chatgpt:

The correct answer is:

d) Burning mouth syndrome has no apparent clinical sign.

Burning Mouth Syndrome (BMS) is characterized by a burning or tingling sensation in the mouth, but there are usually no visible signs or abnormalities in the mouth itself. It is a diagnosis based primarily on symptoms rather than observable clinical signs.

Deepseek:

The correct answer is:

d) Burning mouth syndrome has no apparent clinical sign.

Burning mouth syndrome (BMS) is characterized by a burning sensation in the mouth, often without any visible clinical signs such as ulcers, inflammation, or tissue hyperplasia. Patients may experience significant discomfort, but the oral mucosa typically appears normal upon examination. This makes diagnosis challenging and often requires ruling out other potential causes of oral burning

1. Which of the following is the most compressible area in the lower arch?
2. Buccal shelf area
3. **Retromolar pad**
4. Torus mandibularis
5. Alveolar ridge

ChatGPT

The most compressible area in the lower arch is typically the buccal shelf area.

The buccal shelf is located on the outer surface of the mandible and is relatively soft and compressible compared to other areas, such as the alveolar ridge, retromolar pad, or torus mandibularis, which are more rigid. Therefore, the correct answer is:

1. Buccal shelf area.

Deepseek

You're absolutely correct! The **buccal shelf area** is indeed the most compressible area in the **lower arch (mandibular denture)** due to its soft tissue covering and favorable bone structure.

Here’s why the other options are less compressible:

- **Alveolar ridge** – Can be resorbed and sharp, offering less compressibility.
- **Retromolar pad** – Dense fibrous tissue, important for posterior seal but not highly compressible.
- **Torus mandibularis** – Bony prominence, non-compressible.

Thus, the **buccal shelf** is the primary **stress-bearing area** in mandibular dentures because of its compressibility and horizontal orientation, which helps distribute masticatory forces effectively.

1. Which of the followings acts as dislodging force on denture?
2. Force of adhesion.
3. Atmospheric pressure.
4. **Adhesiveness of food.**
5. Interfacial surface tension.

ChatGPT

The correct answer is:

c) Adhesiveness of food.

The adhesiveness of food can act as a dislodging force on dentures, especially when food particles stick to the denture and pull it away from the gums. This can create a force that may cause the denture to move or loosen.

Deepseek

The correct answer is:

c) Adhesiveness of food.

Explanation:

Adhesiveness of food can act as a dislodging force on dentures. When sticky or adhesive foods are consumed, they can cling to the denture and create a pulling force that may dislodge it from its position.

The other options:

a) Force of adhesion: This helps retain the denture by creating a bond between the denture base and the oral tissues.

b) Atmospheric pressure: This aids in denture retention by creating a seal between the denture and the underlying tissues.

d) Interfacial surface tension: This also contributes to denture retention by stabilizing the denture-fluid-tissue interface.

Thus, only the adhesiveness of food acts as a dislodging force.

1. Which of the following is retentive force of complete dentures?
2. Forces associated with opening of the jaws .
3. Functional and parafunctional movements.
4. **Forces of adhesion.**
5. Forces of gravity.

ChatGPT

The correct answer is:

c) Forces of adhesion.

The retentive force of complete dentures is primarily due to forces of adhesion, which occur when the denture base sticks to the underlying tissue, creating a suction effect. This helps keep the denture in place and provides retention during normal use.

Deepseek

The correct answer is:

c) Forces of adhesion.

Explanation:

Forces of adhesion are retentive forces for complete dentures. Adhesion refers to the attraction between the denture base material and the saliva or oral mucosa, which helps keep the denture in place.

The other options:

a) Forces associated with opening of the jaws: These are not retentive forces; they may actually contribute to dislodging the denture.

b) Functional and parafunctional movements: These movements (e.g., chewing, grinding) can dislodge the denture rather than retain it.

1. The contraindication of denture adhesive is:
2. Dissatisfaction of patient with well made denture.
3. Patients with xerostomia.
4. **Ill fitting dentures.**
5. Partially or wholly paralysed oral mucosa.

ChatGPT

The correct answer is:

c) Ill fitting dentures.

Denture adhesives are not recommended for ill-fitting dentures because they are intended to help stabilize properly fitting dentures, not compensate for poor fit. Using adhesives on dentures that do not fit well can lead to discomfort, irritation, or even further damage to the oral tissues.

Deepseek

The correct answer is:

c) Ill-fitting dentures.

The use of denture adhesive is contraindicated for ill-fitting dentures because it can mask underlying problems such as poor fit, improper occlusion, or tissue irritation. Instead of relying on adhesives, ill-fitting dentures should be adjusted or replaced to ensure proper function and prevent damage to oral tissues.

The other options are not absolute contraindications:

a) Dissatisfaction of patient with well-made denture: Adhesives can sometimes help improve patient satisfaction by enhancing retention.

b) Patients with xerostomia: Adhesives can be beneficial for patients with dry mouth by improving denture retention.

d) Partially or wholly paralyzed oral mucosa: Adhesives may still be used cautiously, depending on the clinical situation.

Thus, ill-fitting dentures are the primary contraindication for denture adhesive use.

1. Which of the following provides stable support for denture?
2. Anterior ridge.
3. **Premolar and molar area.**
4. Incisal area.
5. Retromolar area.

ChatGPT

The correct answer is:

b) Premolar and molar area.

The premolar and molar areas of the oral cavity provide the most stable support for a denture. These areas have a larger surface area and stronger bone structure compared to other parts of the mouth, allowing for better retention and stability of the denture during function.

Deepseek

The correct answer is:

b) Premolar and molar area.

The premolar and molar area provides stable support for a denture because it is typically the primary stress-bearing area in the mandible. This region has a broad, dense bone structure (such as the buccal shelf) that can withstand the vertical occlusal forces exerted during chewing. In contrast:

a) Anterior ridge: This area is often narrower and less capable of providing stable support, especially in cases of ridge resorption.

c) Incisal area: This is not a support area for dentures.

d) Retromolar area: While the retromolar pad is a supporting structure, it is not as stable as the premolar and molar area for bearing occlusal forces.

Thus, the premolar and molar area is the most stable and reliable support for a denture.

1. In a complete denture bearing patient wrinkles around the modulus, low visibility of vermillion border of lip and weak and turned in lip indicate
2. Vitamin B complex deficiency.
3. **Low vertical dimension of occlusion**
4. Viral infection.
5. Neoplasia.

ChatGPT

The correct answer is:

b) Low vertical dimension of occlusion.

Wrinkles around the modulus, low visibility of the vermillion border of the lip, and weak, turned-in lips can indicate a low vertical dimension of occlusion. This condition occurs when the distance between the upper and lower jaws is reduced, which can cause changes in the appearance and function of the lips and facial muscles, leading to the described symptoms.

Deepseek

The correct answer is:

b) Low vertical dimension of occlusion

Explanation:

Low vertical dimension of occlusion (VDO) in a complete denture patient can lead to several clinical signs, including:

Wrinkles around the modiolus (the area at the corner of the mouth).

Low visibility of the vermilion border of the lip (the red part of the lips).

Weak and turned-in lips.

These signs occur because the reduced vertical dimension causes the lower third of the face to collapse, leading to a sunken appearance and loss of lip support.

The other options:

a) Vitamin B complex deficiency: While this can cause oral and systemic symptoms, it does not specifically cause the described changes in lip and facial appearance.

c) Viral infection: Viral infections may cause oral lesions or swelling but do not lead to the described changes in lip and facial structure.

d) Neoplasia: Neoplasia (abnormal tissue growth) may cause swelling or deformities but does not typically result in the specific signs mentioned.

Thus, low vertical dimension of occlusion is the most likely cause of these clinical findings.

1. In a patient, the soft palate turns downward from the hard palate at an angle of about 45°, it is termed as
2. Class I soft palate.
3. **Class II soft palate.**
4. Class III soft palate.
5. Class IV soft palate.

ChatGPT

The correct answer is:

b) Class II soft palate.

In Class II soft palate, the soft palate turns downward from the hard palate at an angle of about 45°. This classification refers to the positioning of the soft palate in relation to the hard palate, which can affect the fit and retention of a denture, as well as speech and swallowing.

Deepseek

The correct answer is:

a) Class I soft palate

Explanation:

The classification of the soft palate is based on its shape and angle relative to the hard palate. A Class I soft palate is characterized by a soft palate that turns downward from the hard palate at an angle of approximately 45°. This is considered the most favorable configuration for denture retention and stability.

The other classifications are:

b) Class II soft palate: The soft palate turns downward at a 70° angle from the hard palate.

c) Class III soft palate: The soft palate turns downward at a 90° angle (horizontal) from the hard palate.

d) Class IV soft palate: The soft palate turns upward from the hard palate, which is the least favorable configuration for denture retention.

Thus, a soft palate that turns downward at a 45° angle is classified as Class I soft palate.

1. Which of the following radiographs is helpful to diagnose a jaw lesion which causes buccal or lingual expansion of jawbone?
2. Panoramic radiograph.
3. Intraoral periapical radiograph.
4. **Occlusion Radiograph.**
5. True lateral radiograph.

ChatGPT

The correct answer is:

a) Panoramic radiograph.

A panoramic radiograph provides a broad view of the entire jaw, including the teeth, bones, and surrounding structures. It is particularly useful for diagnosing jaw lesions that cause buccal or lingual expansion of the jawbone, as it allows for the visualization of the entire jaw in a single image.

Deepseek

The correct answer is:

a) Panoramic radiograph

Explanation:

A panoramic radiograph provides a broad view of the entire jaw, including the maxilla and mandible, and is particularly useful for diagnosing lesions that cause buccal or lingual expansion of the jawbone. It allows for the assessment of the size, location, and extent of the lesion in both horizontal and vertical dimensions.

The other options:

b) Intraoral periapical radiograph: This provides detailed imaging of a small, specific area of the jaw but does not show the full extent of buccal or lingual expansion.

c) Occlusal radiograph: This is useful for visualizing larger areas of the jaw in one dimension (e.g., anterior or posterior regions) but does not provide a comprehensive view of the entire jaw.

d) True lateral radiograph: This is primarily used for evaluating the lateral profile of the skull and is not ideal for diagnosing jaw lesions with buccal or lingual expansion.

Thus, a panoramic radiograph is the most helpful for diagnosing jaw lesions that cause buccal or lingual expansion.

1. Tongue function test normally reveals
2. Ankyloglossia.
3. Over extended lingual flanges of lower denture.
4. Peripheral seal of dentures.
5. All of the above.

ChatGPT

The correct answer is:

d) All of the above.

A tongue function test can reveal a variety of issues, including:

Ankyloglossia (a condition where the tongue is tied or restricted by a short frenulum),

Over-extended lingual flanges of lower denture (which can cause irritation or discomfort),

Peripheral seal of dentures (to assess if the denture is properly sealed against the tissues, which is essential for retention).

Thus, the tongue function test is useful for identifying all of these conditions.

Deepseek

The correct answer is:

d) All of the above

Explanation:

A tongue function test is used to evaluate various aspects of tongue movement and its interaction with dental structures. It can reveal:

a) Ankyloglossia (tongue-tie): A condition where the tongue's range of motion is restricted due to a short or tight lingual frenulum.

b) Overextended lingual flanges of lower denture: The test can identify if the lingual flanges of a lower denture are overextended, interfering with tongue movement.

c) Peripheral seal of dentures: The test can assess whether the tongue is affecting the peripheral seal of the dentures, which is crucial for retention and stability.

Thus, the tongue function test can reveal all of the above conditions.

1. The most common site of epulis fissuratum is
2. Sulcular epithelium.
3. **Around the borders of ill fitting dentures.**
4. Crest of the Ridge.
5. Anterior border of soft palate.

ChatGPT

The correct answer is:

b) Around the borders of ill-fitting dentures.

Epulis fissuratum is a condition that typically occurs due to chronic irritation from ill-fitting dentures. It forms in the form of a fibrous growth around the borders of the denture, often at the junction where the denture touches the soft tissues of the mouth.

Deepseek

The correct answer is:

b) Around the borders of ill-fitting dentures

Explanation:

Epulis fissuratum is a reactive fibrous hyperplasia that occurs due to chronic irritation, most commonly from ill-fitting dentures. It typically develops around the borders of the denture where the tissue is subjected to constant trauma and pressure.

The other options:

a) Sulcular epithelium: This is not a common site for epulis fissuratum.

c) Crest of the ridge: While the ridge may be affected by denture-related issues, epulis fissuratum specifically forms around the denture borders.

d) Anterior border of soft palate: This is not a typical site for epulis fissuratum.

Thus, the most common site of epulis fissuratum is around the borders of ill-fitting dentures

1. The main cause of epulis fissuratum is
2. **Chronic irritation from ill fitting dentures.**
3. Plaque and microorganisms.
4. Failure to provide adequate rest to danger bearing tissue.
5. Rebasing of dentures by tissue conditioning materials.

ChatGPT

The correct answer is:

a) Chronic irritation from ill fitting dentures.

Epulis fissuratum is primarily caused by chronic irritation from ill-fitting dentures, which leads to the formation of fibrous tissue growth along the borders of the denture. This irritation occurs when the dentures don't fit properly, causing mechanical stress and tissue damage over time.

Deepseek

The correct answer is:

a) Chronic irritation from ill-fitting dentures

Explanation:

Epulis fissuratum is primarily caused by chronic irritation from ill-fitting dentures. The constant pressure and friction from poorly fitting dentures lead to reactive fibrous hyperplasia of the oral mucosa, resulting in the formation of epulis fissuratum.

The other options:

b) Plaque and microorganisms: While plaque and microorganisms can cause other oral conditions (e.g., gingivitis, periodontitis), they are not the main cause of epulis fissuratum.

c) Failure to provide adequate rest to danger-bearing tissue: This is not a direct cause of epulis fissuratum.

d) Rebasing of dentures by tissue conditioning materials: This is a treatment approach rather than a cause of epulis fissuratum.

Thus, the main cause of epulis fissuratum is chronic irritation from ill-fitting dentures

1. After surgical removal of prominent genial tubercles, the genioglossus muscle is sutured to
2. Mylohyoid muscle
3. **Geniohyoid muscle**
4. Genial tubercle
5. Digastric muscle

ChatGPT

The correct answer is:

b) Geniohyoid muscle.

After the surgical removal of prominent genial tubercles, the genioglossus muscle is typically sutured to the geniohyoid muscle. This helps maintain the function and stability of the muscles involved in tongue movement and swallowing, as well as prevent complications after the procedure.

Deepseek

The correct answer is:

b) Geniohyoid muscle

Explanation:

After the surgical removal of prominent genial tubercles, the genioglossus muscle (which attaches to the genial tubercles) needs to be reattached to maintain tongue function and stability. It is typically sutured to the geniohyoid muscle, which is located just below the genial tubercles and plays a role in tongue and hyoid bone movement.

The other options:

a) Mylohyoid muscle: This muscle forms the floor of the mouth but is not the primary site for reattachment of the genioglossus muscle.

c) Genial tubercle: The genial tubercles are removed during the surgery, so they cannot be used for reattachment.

d) Digastric muscle: This muscle is not involved in the reattachment process of the genioglossus muscle.

Thus, the genioglossus muscle is sutured to the geniohyoid muscle after the removal of prominent genial tubercles.

1. The most common site of undercut in mandible is
2. Molar region.
3. Mylohyoid Ridge region.
4. **Incisor region.**
5. Premolar region.

ChatGPT

The correct answer is:

b) Mylohyoid Ridge region.

The mylohyoid ridge is the most common site of undercut in the mandible. This ridge can cause challenges in the retention of dentures, as it creates an area where the denture might not fit properly or may become dislodged. The presence of an undercut in this area needs to be carefully considered when designing dentures.

Deepseek

The correct answer is:

b) Mylohyoid Ridge region

Explanation:

The mylohyoid ridge region is the most common site of undercut in the mandible. This area often has a prominent bony ridge due to the attachment of the mylohyoid muscle, which can create an undercut that affects denture fabrication and placement.

The other options:

a) Molar region: While undercuts can occur in the molar region, they are less common compared to the mylohyoid ridge region.

c) Incisor region: The incisor region typically does not have significant undercuts.

d) Premolar region: Undercuts in the premolar region are less common compared to the mylohyoid ridge region.

Thus, the mylohyoid ridge region is the most common site of undercut in the mandible.

1. In a denture wearing patient with extremely resorbed mandibular ridge, there is pain and paresthesia of the lower lip. Which of the following may be the most probable cause?
2. Irritation of lower lip from denture flanges.
3. Denture stomatitis
4. **Pressure on the mental nerve by Denture base**
5. Vitamin B complex deficiency.

ChatGPT

The correct answer is:

c) Pressure on the mental nerve by Denture base.

In a patient with an extremely resorbed mandibular ridge, the denture base may exert pressure on the mental nerve, leading to symptoms like pain and paresthesia (tingling or numbness) of the lower lip. This is because the mental nerve runs near the ridge, and as the ridge resorbs, the nerve can be more easily compressed by the denture base.

Deepseek

The correct answer is:

c) Pressure on the mental nerve by denture base

Explanation:

In a patient with an extremely resorbed mandibular ridge, the mental nerve (a branch of the inferior alveolar nerve) may become more superficial and vulnerable to pressure from the denture base. This can lead to pain and paresthesia (tingling or numbness) of the lower lip due to nerve compression or irritation.

The other options:

a) Irritation of lower lip from denture flanges: This could cause discomfort or soreness but is less likely to cause paresthesia.

b) Denture stomatitis: This is a fungal infection of the oral mucosa under the denture and does not typically cause paresthesia.

d) Vitamin B complex deficiency: While this can cause neurological symptoms, it is not directly related to denture use or resorbed ridges.

Thus, the most probable cause of pain and paresthesia in this scenario is pressure on the mental nerve by the denture base.

1. The most common site of bony exostosis is
2. Palatal side of posterior maxilla.
3. Buccal side of posterior mandible.
4. **Buccal side of posterior maxilla.**
5. Buccal side of anterior mandible.

ChatGPT

The correct answer is:

b) Buccal side of posterior mandible.

The most common site of bony exostosis (benign bony growths) is typically on the buccal side of the posterior mandible. These exostoses are often asymptomatic but can present challenges when designing dentures, as they may interfere with denture fit and function.

Deepseek

The correct answer is:

a) Palatal side of posterior maxilla

Explanation:

Bony exostoses are benign, localized overgrowths of bone. The most common site for bony exostosis is the palatal side of the posterior maxilla, often referred to as torus palatinus. These exostoses are typically asymptomatic but can interfere with denture fabrication and placement.

The other options:

b) Buccal side of posterior mandible: Exostoses can occur here (referred to as torus mandibularis), but they are less common than palatal tori.

c) Buccal side of posterior maxilla: This is not a common site for bony exostoses.

d) Buccal side of anterior mandible: This is also not a common site for bony exostoses.

Thus, the most common site of bony exostosis is the palatal side of the posterior maxilla

1. Which of the following is stress bearing area for maxillary denture
2. Palatine fovea region
3. **Rugae area.**
4. Median palatal suture
5. Torus palatinus.

ChatGPT

The correct answer is:

b) Rugae area.

The rugae area is considered one of the stress-bearing areas for maxillary dentures. It provides support and stability for the denture, especially during function. The other areas, such as the palatine fovea, median palatal suture, and torus palatinus, are less effective in providing stress-bearing support for dentures.

Deepseek

The correct answer is:

a) Palatine fovea region

Explanation:

The palatine fovea region (also known as the posterior palatal seal area) is a stress-bearing area for maxillary dentures. It is located near the junction of the hard and soft palate and helps provide retention and stability to the denture by creating a seal.

The other options:

b) Rugae area: The rugae are ridges on the anterior hard palate that aid in speech and food manipulation but are not primary stress-bearing areas.

c) Median palatal suture: This area is not a stress-bearing region and may even be a relief area in denture fabrication to avoid pressure on the midline suture.

d) Torus palatinus: A bony exostosis on the hard palate is not a stress-bearing area and often requires relief in the denture base.

Thus, the palatine fovea region is the primary stress-bearing area for maxillary dentures.

1. Which of the following are limiting areas except?
2. Hamular notches.
3. Labial frenum.
4. Posterior palatal seal area.
5. **Maxillary tuberosity.**

**ChatGPT**

The correct answer is:

c) Posterior palatal seal area.

The posterior palatal seal area is not a limiting area; instead, it is an area that helps retain and stabilize the denture by creating a seal. In contrast, limiting areas are boundaries that can restrict the movement of the denture, and they include structures like:

Hamular notches

Labial frenum

Maxillary tuberosity

**Deepseek**

The correct answer is:

c) Posterior palatal seal area

Explanation:

The posterior palatal seal area is not a limiting area; it is a stress-bearing area that helps provide retention and stability to the maxillary denture by creating a seal at the junction of the hard and soft palate.

The other options are limiting areas:

a) Hamular notches: These are anatomical landmarks that limit the posterior extension of the maxillary denture.

b) Labial frenum: This is a limiting area that affects the anterior border of the denture.

d) Maxillary tuberosity: This is a limiting area that determines the posterior extension of the denture.

Thus, the posterior palatal seal area is the exception and is not a limiting area.

1. Which of the following is not a relief area?
2. Incisive foramen.
3. Median palatal sutures.
4. **Palatine fovea region**
5. Tori

ChatGPT

It looks like you're analyzing the concept of relief areas in complete dentures and the various anatomical regions that require attention during denture fabrication.

Your breakdown of the options is thorough, but there's a small clarification needed for option (d) Tori. While tori themselves are indeed bony prominences that cannot be compressed and typically need to be avoided or removed during denture fabrication, the key distinction is that they aren't "relief areas" as they don’t require space for comfort. Relief areas are regions where additional space is deliberately added to the denture base to avoid direct pressure on sensitive or vulnerable tissue.

So, your answer of d) Tori is correct, as tori are not classified as relief areas.

Deepseek

The correct answer is:

d) Tori

Explanation:

Relief areas in complete dentures are regions that require space (relief) in the denture base to avoid pressure, discomfort, or tissue damage. These areas are usually bony prominences, foramina, or fragile tissues.

Let’s analyze each option:

a) Incisive foramen – A relief area because it contains nerves and blood vessels; pressure here can cause pain.

b) Median palatal sutures – A relief area (especially in patients with a prominent mid-palatal suture) to prevent irritation due to bony irregularity.

c) Palatine fovea region – Contains minor salivary glands and needs relief to avoid obstruction and discomfort.

d) Tori (mandibular or palatal) – Not a relief area but rather an undercut that must be avoided or surgically removed before denture fabrication. Tori are bony exostoses and cannot be compressed; they require blockout in denture design.

Final Answer:

d) Tori (Not a relief area)

1. The support for maxillary denture is provided mainly by
2. Mucous membrane
3. **Hard palate.**
4. Posterior palatal seal.
5. Rugae area.

ChatGPT

The correct answer is:

b) Hard palate.

The primary support for a maxillary denture is provided by the hard palate. The hard palate offers a broad and stable surface for the denture to rest on, ensuring proper support and retention. While areas like the rugae and posterior palatal seal contribute to retention, the hard palate is the main support structure for the maxillary denture.

Deepseek

The correct answer is:

b) Hard palate

Explanation:

The hard palate is the primary support for the maxillary denture. It is a bony structure covered by mucous membrane that provides a stable and firm foundation for the denture.

The other options:

a) Mucous membrane: While the mucous membrane covers the hard palate and contributes to support, it is not the primary source of support.

c) Posterior palatal seal: This area helps with retention and stability but does not provide primary support.

d) Rugae area: The rugae are ridges on the anterior hard palate that aid in speech and food manipulation but do not provide primary support.

Thus, the hard palate is the main structure that provides support for the maxillary denture.

1. Following muscles are associated with maxillary buccal frenum except
2. Orbicularis oris.
3. Buccinator.
4. **Masseter.**
5. Caninus.

ChatGPT

The correct answer is:

c) Masseter.

The masseter is not associated with the maxillary buccal frenum. The muscles associated with the maxillary buccal frenum include:

Orbicularis oris (involved in the movement of the lips),

Buccinator (helps in the movement of the cheeks),

Caninus (involved in the movement of the upper lip).

The masseter is a muscle of mastication and is involved in chewing, but it does not have a direct association with the buccal frenum.

Deepseek

The correct answer is:

c) Masseter

Explanation:

The masseter muscle is not associated with the maxillary buccal frenum. It is a muscle of mastication located near the angle of the mandible and is not involved in the movement or structure of the buccal frenum.

The other muscles are associated with the maxillary buccal frenum:

a) Orbicularis oris: This muscle surrounds the mouth and contributes to the formation of the buccal frenum.

b) Buccinator: This muscle forms the cheek and is closely related to the buccal frenum.

d) Caninus (levator anguli oris): This muscle elevates the angle of the mouth and is associated with the buccal frenum.

Thus, the masseter muscle is the exception and is not associated with the maxillary buccal frenum.

1. Which of the following pulls naturally buccal frenum forward during function of mandible?
2. Buccinator.
3. Caninus.
4. **Orbicularis oris.**
5. Masseter.

ChatGPT

The correct answer is:

a) Buccinator.

The buccinator muscle plays a key role in pulling the buccal frenum forward during the function of the mandible. It helps with the movement of the cheeks and lips during chewing, speaking, and other oral functions. The buccinator's action contributes to the forward movement of the buccal frenum, especially during mandibular movements.

Deepseek

The correct answer is:

a) Buccinator

Explanation:

The buccinator muscle is responsible for pulling the buccal frenum forward during the function of the mandible. It is a thin, horizontal muscle that forms the cheek and helps in mastication and facial expression by compressing the cheek against the teeth.

The other options:

b) Caninus (levator anguli oris): This muscle elevates the angle of the mouth but does not pull the buccal frenum forward.

c) Orbicularis oris: This muscle surrounds the mouth and is involved in lip movements but does not pull the buccal frenum forward.

d) Masseter: This muscle is primarily involved in mastication and does not affect the buccal frenum.

Thus, the buccinator muscle is the muscle that naturally pulls the buccal frenum forward during mandibular function.

1. Which of the following pulls maxillary frenum backward during functional activities of mandible?
2. Orbicularis oris.
3. Masseter.
4. **Buccinator.**
5. Caninus.

ChatGPT

The correct answer is:

a) Orbicularis oris.

The orbicularis oris muscle pulls the maxillary frenum backward during functional activities of the mandible. This muscle surrounds the mouth and is responsible for movements like closing the lips and shaping them during speech, eating, and other oral activities.

Deepseek

The correct answer is:

a) Orbicularis oris

Explanation:

The orbicularis oris muscle is responsible for pulling the maxillary frenum backward during functional activities of the mandible. This muscle surrounds the mouth and is involved in various lip movements, including pulling the frenum backward.

The other options:

b) Masseter: This muscle is primarily involved in mastication and does not affect the maxillary frenum.

c) Buccinator: This muscle compresses the cheek against the teeth and is involved in mastication but does not pull the maxillary frenum backward.

d) Caninus (levator anguli oris): This muscle elevates the angle of the mouth but does not pull the maxillary frenum backward.

Thus, the orbicularis oris muscle is the muscle that pulls the maxillary frenum backward during functional activities of the mandible.

1. The upper denture must extend distally.
2. **To the posterior vibrating line or 1 to 2 mm posterior to it.**
3. 4 mm posterior to vibrating line.
4. Upto fovea palatini.
5. Short of the vibrating line.

ChatGPT

The correct answer is:

a) To the posterior vibrating line or 1 to 2 mm posterior to it.

For an upper denture, the posterior extension should ideally be at or 1 to 2 mm posterior to the posterior vibrating line. This ensures proper retention and stability while maintaining comfort for the patient, allowing the denture to rest on the soft tissues without causing irritation. The posterior vibrating line marks the transition between the hard and soft palates, and this extension helps achieve a good seal.

Deepseek

The correct answer is:

a) To the posterior vibrating line or 1 to 2 mm posterior to it

Explanation:

The posterior vibrating line is an anatomical landmark that marks the junction between the hard and soft palate. For optimal retention and stability, the upper denture should extend distally to the posterior vibrating line or 1 to 2 mm posterior to it. This ensures a proper seal and prevents food impaction while avoiding overextension, which can cause discomfort.

The other options:

b) 4 mm posterior to vibrating line: This would overextend the denture, leading to potential discomfort and instability.

c) Up to fovea palatini: The fovea palatini are small depressions near the posterior vibrating line, but the denture should not extend solely based on this landmark.

d) Short of the vibrating line: This would result in inadequate extension, compromising retention and seal.

Thus, the upper denture must extend distally to the posterior vibrating line or 1 to 2 mm posterior to it.

1. The connective tissue layer of mucous membrane is known as.
2. Lamina dura.
3. Lamina densa.
4. **Lamina propria.**
5. Duramater.

ChatGPT

The correct answer is:

c) Lamina propria.

The lamina propria is the connective tissue layer of the mucous membrane. It lies beneath the epithelial layer and contains blood vessels, nerves, and lymphatic tissue, providing support and nourishment to the overlying epithelium.

Deepseek

The correct answer is:

c) Lamina propria

Explanation:

The lamina propria is the connective tissue layer of the mucous membrane. It lies beneath the epithelial layer and provides structural support, blood supply, and nerve innervation to the mucosa.

The other options:

a) Lamina dura: This is a layer of compact bone that lines the tooth socket (alveolar bone) and is not part of the mucous membrane.

b) Lamina densa: This is a component of the basement membrane in epithelial tissues, not the connective tissue layer.

d) Dura mater: This is the outermost layer of the meninges surrounding the brain and spinal cord, unrelated to the mucous membrane.

Thus, the connective tissue layer of the mucous membrane is known as the lamina propria.

1. Which of the following is the primary stress bearing area for the maxillary complete denture?
2. Median palatal suture.
3. **Horizontal portion of the hard palate lateral to midline.**
4. Rugae area.
5. Soft palate.

ChatGPT

The correct answer is:

b) Horizontal portion of the hard palate lateral to midline.

The primary stress-bearing area for the maxillary complete denture is the horizontal portion of the hard palate lateral to the midline. This area provides solid support for the denture because it has dense, firm tissue that can withstand the functional forces of mastication. Other areas, like the rugae or soft palate, contribute to retention but are not the primary stress-bearing zones.

Deepseek

The correct answer is:

b) Horizontal portion of the hard palate lateral to midline

Explanation:

The horizontal portion of the hard palate lateral to the midline is the primary stress-bearing area for the maxillary complete denture. This area is firm and provides stable support for the denture due to the underlying bone and overlying mucous membrane.

The other options:

a) Median palatal suture: This area is not a stress-bearing area and often requires relief in the denture to avoid pressure on the midline suture.

c) Rugae area: The rugae are ridges on the anterior hard palate that aid in speech and food manipulation but are not primary stress-bearing areas.

d) Soft palate: The soft palate is not a stress-bearing area; it is a movable structure that helps with functions like swallowing and speech.

Thus, the horizontal portion of the hard palate lateral to the midline is the primary stress-bearing area for the maxillary complete denture.

1. As the resorption takes place, the incissive foramen
2. Lies close to greater palatine foramen.
3. Lies away from greater palatine foramen.
4. Lies away from crest of the residual ridge.
5. **Lies close to crest of the residual ridge.**

**ChatGPT**

The correct answer is:

b) Lies away from greater palatine foramen.

As resorption of the alveolar ridge occurs, the incisive foramen moves away from the greater palatine foramen. This happens because the bone in the anterior portion of the palate resorbs more than the posterior portion, leading to a greater separation between the incisive foramen and the greater palatine foramen.

**Deepseek**

The correct answer is:

**d) Lies close to crest of the residual ridge**

**Explanation:**

- As **resorption** of the alveolar ridge progresses, the **incisive foramen** (located in the anterior palate) **lies closer to the crest of the residual ridge**. This occurs because the alveolar bone resorbs downward, bringing the incisive foramen closer to the ridge crest.

The other options:

- **a) Lies close to greater palatine foramen**: The greater palatine foramen is located in the posterior palate and is not directly affected by resorption of the anterior ridge.
- **b) Lies away from greater palatine foramen**: This is not relevant to the positional changes of the incisive foramen due to resorption.
- **c) Lies away from crest of the residual ridge**: This is incorrect because resorption brings the incisive foramen closer to the crest, not away from it.

Thus, as resorption takes place, the **incisive foramen lies close to the crest of the residual ridge**.

1. Torus palatinus is found in about
2. 10% of the population.
3. **20% of the population.**
4. 30% of the population.
5. 40% of the population.

ChatGPT

The correct answer is:

b) 20% of the population.

Torus palatinus is a benign bony growth found on the hard palate. It is present in about 20% of the population, although its prevalence can vary based on factors like age, genetics, and ethnicity.

Deepseek

The correct answer is:

b) 20% of the population

Explanation:

Torus palatinus is a bony exostosis (overgrowth) found on the midline of the hard palate. It is a relatively common anatomical variation, occurring in approximately 20% of the population. It is more common in females and certain ethnic groups.

The other options:

a) 10% of the population: This is an underestimate of the prevalence of torus palatinus.

c) 30% of the population: This is an overestimate of the prevalence.

d) 40% of the population: This is also an overestimate.

Thus, torus palatinus is found in about 20% of the population

1. Which of the following muscles is present beneath the buccal frenum?
2. Orbicularis oris muscle.
3. Buccinator muscle.
4. **Levator anguli oris.**
5. Masseter muscle.

ChatGPT

The correct answer is:

b) Buccinator muscle.

The buccinator muscle is located beneath the buccal frenum. It plays a role in controlling the movement of the cheek and helps with functions like chewing, sucking, and blowing. This muscle is important for the proper fit and retention of dentures, particularly in the area of the buccal frenum.

Deepseek

he correct answer is:

b) Buccinator muscle

Explanation:

The buccinator muscle is present beneath the buccal frenum. It is a thin, horizontal muscle that forms the cheek and is involved in mastication and facial expression by compressing the cheek against the teeth.

The other options:

a) Orbicularis oris muscle: This muscle surrounds the mouth and is involved in lip movements but is not located beneath the buccal frenum.

c) Levator anguli oris (caninus): This muscle elevates the angle of the mouth but is not located beneath the buccal frenum.

d) Masseter muscle: This muscle is a muscle of mastication located near the angle of the mandible and is not associated with the buccal frenum.

Thus, the buccinator muscle is the muscle present beneath the buccal frenum.

1. Vibrating line is about
2. **2 mm in front of fovea palatine.**
3. 2 mm behind fovea palatine.
4. 4 mm in front of fovea palatine.
5. 4 mm behind fovea palatine.

ChatGPT

The correct answer is:

b) 2 mm behind fovea palatine.

The vibrating line is typically located about 2 mm behind the fovea palatina. This line marks the junction between the hard and soft palate and is important for designing dentures, especially for achieving proper posterior seal and retention of the maxillary denture.

Deepseek

The correct answer is:

a) 2 mm in front of fovea palatine

Explanation:

The vibrating line is an anatomical landmark that marks the junction between the hard and soft palate. It is located approximately 2 mm in front of the fovea palatine, which are small depressions near the posterior border of the hard palate.

The other options:

b) 2 mm behind fovea palatine: This is incorrect because the vibrating line is anterior to the fovea palatine.

c) 4 mm in front of fovea palatine: This is too far anterior to the fovea palatine.

d) 4 mm behind fovea palatine: This is incorrect because the vibrating line is anterior to the fovea palatine.

Thus, the vibrating line is located 2 mm in front of the fovea palatine.

1. The distal end of the maxillary denture should be
2. Not extended to vibrating line.
3. 1-2 mm anterior to vibrating line.
4. **1-2 mm posterior to vibrating line.**
5. All of the above.

ChatGPT

The correct answer is:

c) 1-2 mm posterior to vibrating line.

The distal end of the maxillary denture should ideally extend 1-2 mm posterior to the vibrating line. This extension helps create a posterior seal, improving the retention and stability of the denture while ensuring comfort for the patient.

Deepseek

The correct answer is:

c) 1-2 mm posterior to vibrating line

Explanation:

The distal end of the maxillary denture should extend 1-2 mm posterior to the vibrating line. This ensures a proper seal and retention of the denture while avoiding overextension, which can cause discomfort or gagging.

The other options:

a) Not extended to vibrating line: This would result in inadequate extension, compromising retention and seal.

b) 1-2 mm anterior to vibrating line: This would also result in inadequate extension and poor retention.

d) All of the above: This is incorrect because only extending 1-2 mm posterior to the vibrating line is the correct guideline.

Thus, the distal end of the maxillary denture should extend 1-2 mm posterior to the vibrating line.

1. Which of the following is always a relief area?
2. Portion of hard palate lateral to mid palatal suture.
3. Rugae area.
4. Residual ridge.
5. **Mid palatal suture area.**

**ChatGPT**

The correct answer is:

d) Mid palatal suture area.

The mid palatal suture area is always a relief area in denture design. This area is where the two halves of the maxilla fused during development, and it is a site of weakness in the bone. As such, it should be relieved in denture construction to prevent discomfort or pressure on this delicate area, especially when creating a complete maxillary denture.

**Deepseek**

The correct answer is:

d) Mid palatal suture area

Explanation:

The mid palatal suture area is always a relief area in denture fabrication. This is because the midline suture is a bony area with minimal submucosal tissue, making it sensitive to pressure. Providing relief in this area prevents discomfort and ulceration.

The other options:

a) Portion of hard palate lateral to mid palatal suture: This is a stress-bearing area and not a relief area.

b) Rugae area: This area is not typically a relief area; it aids in speech and food manipulation.

c) Residual ridge: This is a primary support area for the denture and not a relief area.

Thus, the mid palatal suture area is always a relief area

1. The material of choice for preliminary impression in completely edentulous patient is
2. Impression compound.
3. **Alginate**.
4. Plaster.
5. Zinc oxide Eugenol paste.

ChatGPT

The material of choice for preliminary impressions in completely edentulous patients is:

b) Alginate.

Explanation:

Alginate is widely used for preliminary impressions because it is easy to use, relatively inexpensive, and provides good detail for the soft tissues of the edentulous ridge. It also has the advantage of being hydrophilic (able to work well in a moist environment) and setting quickly, which is helpful for making accurate impressions in a clinical setting.

Deepseek

The material of choice for preliminary impressions in completely edentulous patients is:

a) Impression compound.

Explanation:

Impression compound is a thermoplastic material that is rigid at room temperature but becomes pliable when heated. It is commonly used for preliminary impressions in edentulous patients because it provides good dimensional stability and can adequately capture the broad anatomical features of an edentulous arch.

Alginate (b) is more commonly used for preliminary impressions in dentate or partially edentulous patients due to its ease of use and ability to record finer details, but it lacks the rigidity needed for edentulous ridges.

Plaster (c) is rarely used for preliminary impressions due to its brittleness and difficulty in removal.

Zinc oxide eugenol paste (d) is typically used for final impressions in edentulous patients because of its excellent accuracy and fine detail reproduction, but it is too rigid and unforgiving for preliminary impressions.

Thus, impression compound (a) is the best choice for preliminary impressions in completely edentulous patients.

1. How much larger should be the metal stock tray than the outer surface of residual ridge for alginate impression material?
2. Approximately 2 mm.
3. **Approximately 5 mm.**
4. Approximately 1 mm.
5. Approximately 7 mm.

ChatGPT

The correct answer is:

a) Approximately 2 mm.

For alginate impressions, the metal stock tray should be approximately 2 mm larger than the outer surface of the residual ridge. This extra space allows the impression material to flow around the ridge and capture detailed anatomical features while preventing the material from being too thin in areas that may lead to distortion or inadequate recording.

Deepseek

The correct answer is:

b) Approximately 5 mm.

When selecting a metal stock tray for alginate impressions, the tray should be approximately 5 mm larger than the outer surface of the residual ridge. This allows sufficient space for the alginate impression material to adequately capture the details of the ridge and surrounding structures without being too tight or too loose.

1. The thickness of the custom tray should be
2. 4 to 5 mm.
3. **2 to 3 mm.**
4. 2 to 5 mm.
5. 3 to 4 mm.

ChatGPT

The correct answer is:

b) 2 to 3 mm.

The thickness of a custom tray should be approximately 2 to 3 mm. This thickness ensures that the tray is strong enough to handle the impression material, provides adequate support during the impression-taking process, and ensures even distribution of the impression material.

Deepseek

The correct answer is:

b) 2 to 3 mm.

The thickness of a custom tray should typically be 2 to 3 mm. This thickness provides adequate strength and stability for the tray while ensuring it is not too bulky or uncomfortable for the patient. It also allows for proper adaptation of the impression material.

1. For the purpose of border molding, the flanges of custom tray should be
2. 2 mm extended to the tissue reflection.
3. **2 mm short of the tissue reflection.**
4. Equal to the tissue reflection.
5. 4 mm short of the tissue reflection.

ChatGPT

The correct answer is:

b) 2 mm short of the tissue reflection.

For border molding, the flanges of the custom tray should be 2 mm short of the tissue reflection. This allows for proper border molding to capture the correct contours and ensure that the denture flanges fit well without impinging on the soft tissues, ensuring both comfort and retention.

Deepseek

The correct answer is:

b) 2 mm short of the tissue reflection.

For border molding, the flanges of the custom tray should be 2 mm short of the tissue reflection. This allows space for the border molding material (such as impression compound or wax) to properly record the functional depth and width of the sulcus during the molding process. If the tray extends too far, it can interfere with tissue movement and result in an inaccurate impression.

1. The following are sealing areas for mandibular complete denture except
2. Retromylohyoid fossa.
3. **Buccal shelf.**
4. Floor of the mouth.
5. Alveolingual sulcus.

ChatGPT

The correct answer is c) Floor of the mouth.

Explanation:

For a mandibular complete denture, the primary areas that contribute to the sealing or retention of the denture are:

Retromylohyoid fossa: This is an important area for denture retention, as it helps in preventing dislodgement of the denture.

Buccal shelf: A stable area that provides retention, located in the buccal region of the mandible.

Alveolingual sulcus: This area is important for sealing and retention of the denture, as it forms part of the lingual boundary.

However, the floor of the mouth is not a primary sealing area for the mandibular denture. It does not directly contribute to the retention or sealing of the denture in the same way as the other areas.

Deepseek

The correct answer is:

c) Floor of the mouth.

Explanation:

The sealing areas (peripheral seal areas) of a mandibular complete denture are the regions where the denture borders contact the soft tissues to create a seal, preventing air ingress and improving retention. These areas include:

Retromylohyoid fossa (a) – The posterior seal area, located distal to the mylohyoid ridge.

Buccal shelf (b) – The primary stress-bearing area, providing support and lateral stability.

Alveolingual sulcus (d) – The lingual sulcus area, which extends from the lingual alveolar ridge to the floor of the mouth (but the floor itself is not a sealing area).

The floor of the mouth (c) is not a sealing area because it is a dynamic region influenced by tongue movements and sublingual gland activity. The denture border must extend into the alveolingual sulcus but should not compress the floor of the mouth, as this would cause displacement of the denture during function.

Thus, the correct answer is (c) Floor of the mouth, as it is not a sealing area for mandibular complete dentures.

1. Limiting structure of mandibular denture is
2. **Retromolar fossa and pad**.
3. The buccal shelf.
4. Genial tubercles.
5. Hamular notch.

ChatGPT

The correct answer is:

a) Retromolar fossa and pad.

The retromolar fossa and pad are considered the limiting structures for a mandibular denture. These areas provide support and help in defining the boundaries for the denture. Proper extension to the retromolar pad is crucial for achieving stability and retention in a mandibular denture.

Deepseek

The correct answer is:

a) Retromolar fossa and pad.

The retromolar fossa and pad are limiting structures for the mandibular denture. They define the posterior border of the mandibular denture and help determine its extension in that region. Other options listed are not limiting structures for the mandibular denture:

b) The buccal shelf is a primary stress-bearing area, not a limiting structure.

c) Genial tubercles are bony prominences on the lingual side of the mandible and are not directly related to limiting the denture.

d) Hamular notch is a limiting structure for the maxillary denture, not the mandibular denture.

Thus, the retromolar fossa and pad are the correct limiting structures for the mandibular denture.

1. The direction of vertical occlusal forces to the buccal shelf area is
2. Horizontal.
3. Inclined at an angle to horizontal.
4. **Vertical.**
5. Inclined at an angle to vertical.

ChatGPT

The correct answer is:

b) Inclined at an angle to horizontal.

The vertical occlusal forces acting on a mandibular denture are inclined at an angle to horizontal when they are directed toward the buccal shelf area. This angle helps in distributing the forces efficiently to the more stable regions of the mandible, contributing to the retention and stability of the denture.

Deepseek

The correct answer is:

c) Vertical.

The direction of vertical occlusal forces to the buccal shelf area is vertical. The buccal shelf is a primary stress-bearing area for the mandibular denture because it is composed of dense cortical bone that can withstand vertical occlusal forces. These forces are transmitted vertically through the denture to the underlying bone, making the buccal shelf an ideal area for supporting the denture.

1. The primary stress bearing area for lower denture is.
2. Crest of alveolar ridge.
3. **Buccal shelf area.**
4. Retromolar pad.
5. Rugae area.

ChatGPT

The correct answer is:

b) Buccal shelf area.

The buccal shelf area is the primary stress-bearing area for the lower denture. This area is relatively flat and stable, providing significant support for the denture during functional forces like chewing. It is located on the lateral side of the mandible, beneath the buccal mucosa. Other areas, like the crest of the alveolar ridge and the retromolar pad, also contribute to denture stability but are not as important as the buccal shelf for bearing stress.

Deepseek

The correct answer is:

b) Buccal shelf area.

The buccal shelf area is the primary stress-bearing area for the lower denture. It is composed of dense cortical bone, which makes it well-suited to withstand the vertical occlusal forces transmitted through the denture. Other areas listed are not primary stress-bearing areas:

a) Crest of alveolar ridge: This is a secondary stress-bearing area, as it may resorb over time and is less ideal for primary support.

c) Retromolar pad: This is a supporting area but not the primary stress-bearing area.

d) Rugae area: This is a feature of the maxillary arch, not the mandibular arch.

Thus, the buccal shelf area is the correct answer.

1. The buccinator muscle fibres run in the buccal shelf just overlying the bone:
2. Horizontally in mediolateral direction.
3. Vertically in anteroposterior direction.
4. **Horizontally in anteroposterior direction.**
5. Laterally.

ChatGPT

The correct answer is:

c) Horizontally in anteroposterior direction.

The buccinator muscle fibers in the buccal shelf run horizontally in an anteroposterior direction. This orientation is important in denture design because the buccinator helps stabilize the denture during chewing and other functional movements of the mouth. Understanding the direction of these fibers helps in achieving a proper fit and retention for mandibular dentures.

Deepseek

The correct answer is:

a) Horizontally in mediolateral direction.

The buccinator muscle fibers run horizontally in a mediolateral direction overlying the bone in the buccal shelf area. This orientation of the muscle fibers helps in functions such as mastication and maintaining the cheek's position. The horizontal arrangement is also important to consider when designing the flange of a mandibular denture to avoid interference with muscle function.

1. Distobuccal corner of lower denture is made to converge rapidly to allow
2. Contraction of mylohyoid muscle.
3. Contraction of pterygomandibular raphe.
4. **Contraction of masseter muscle.**
5. Contraction of buccinator muscle.

ChatGPT

The correct answer is:

b) Contraction of pterygomandibular raphe.

The distobuccal corner of the lower denture is designed to converge rapidly to allow for the contraction of the pterygomandibular raphe. This helps improve the retention and stability of the mandibular denture by accommodating the functional movements of the muscles in that area, ensuring a better fit and preventing the denture from dislodging.

Deepseek

The correct answer is:

c) Contraction of masseter muscle.

The distobuccal corner of the lower denture is made to converge rapidly to accommodate the contraction of the masseter muscle. The masseter muscle lies over the distobuccal area of the mandible, and its contraction during function can displace the denture if the distobuccal flange is too bulky. By converging the distobuccal corner, the denture allows for proper muscle movement without interference, ensuring stability and retention of the denture during function.

1. Anteriorly, the mylohyoid muscle lies
2. Above the sublingual glands.
3. **Deep to sublingual gland.**
4. At the level of sublingual gland.
5. None of the above.

ChatGPT

The correct answer is:

a) Above the sublingual glands.

The mylohyoid muscle lies above the sublingual glands. The mylohyoid forms the floor of the mouth and is located above the sublingual glands, which are situated beneath the mucosa of the floor of the mouth. The muscle's position is important in denture design, especially in ensuring that the denture does not impinge on the sublingual area

Deepseek

The correct answer is:

a) Above the sublingual glands.

Anteriorly, the mylohyoid muscle lies above the sublingual glands. The mylohyoid muscle forms the floor of the mouth, and in the anterior region, it is positioned superior to the sublingual glands. This anatomical relationship is important to consider when designing the lingual flange of a mandibular denture to ensure proper extension and avoid interference with the muscle and glandular structures.

1. On which of the following regions, the mylohyoid muscle has no influence?
2. Sublingual gland region.
3. Premolar region.
4. Molar Region.
5. **Retromylohyoid fossa.**

**ChatGPT**

The correct answer is:

d) Retromylohyoid fossa.

The mylohyoid muscle does not have any direct influence on the retromylohyoid fossa. The muscle affects areas above the mylohyoid line, such as the sublingual gland region, premolar region, and molar region, but not the retromylohyoid fossa, which is located posterior to the mylohyoid muscle. This area is important in denture design, but its position is not influenced by the mylohyoid muscle's function.

**Deepseek**

The correct answer is:

b) Premolar region.

The mylohyoid muscle has no direct influence on the premolar region. The mylohyoid muscle primarily affects the sublingual gland region (forms the floor of the mouth), the molar region (supports the lingual flange of the denture), and the retromylohyoid fossa (forms the posterior lingual seal area). However, in the premolar region, the mylohyoid muscle does not play a significant role, as it is more anterior and does not directly interact with this area.

1. Which of the following muscles causes bulge in the wall of retromylohyoid curtain?
2. Masseter muscle.
3. Mylohyoid.
4. **Medial pterygoid.**
5. Buccinator.

ChatGPT

The correct answer is:

b) Mylohyoid.

The mylohyoid muscle causes a bulge in the wall of the retromylohyoid curtain. The muscle forms the floor of the mouth and extends from the mylohyoid line of the mandible to the hyoid bone. When the mylohyoid muscle contracts, it can create a bulge in the retromylohyoid area, which is an important region for denture design, affecting the retention and stability of mandibular dentures.

Deepseek

The correct answer is:

c) Medial pterygoid.

The medial pterygoid muscle causes a bulge in the wall of the retromylohyoid curtain. The retromylohyoid curtain is the posterior boundary of the lingual flange of a mandibular denture, and the medial pterygoid muscle lies in close proximity to this area. When the medial pterygoid muscle contracts, it can create a bulge in the retromylohyoid region, which must be accounted for during denture fabrication to ensure proper fit and function.

1. The middle part of lingual flange of lower denture curves
2. Laterally.
3. **Medially.**
4. Distant.
5. None.

ChatGPT

The correct answer is:

b) Medially.

The middle part of the lingual flange of the lower denture curves medially. This medial curve helps to follow the contours of the floor of the mouth and accommodates the movements of the tongue. The correct design of the lingual flange is important for ensuring the stability and comfort of the denture.

Deepseek

The correct answer is:

a) Laterally.

The middle part of the lingual flange of the lower denture curves laterally. This lateral curvature is designed to accommodate the natural contour of the floor of the mouth and the mylohyoid muscle. By curving laterally, the lingual flange ensures proper extension and stability of the denture while avoiding interference with the movement of the tongue and surrounding tissues.

1. The mylohyoid muscle attachment extends distally
2. Up to the mylohyoid ridge.
3. **Up to about one cm back of mylohyoid ridge.**
4. Up to about one cm short of distal end of mylohyoid ridge.
5. Up to retromylohyoid fossa.

ChatGPT

The correct answer is:

b) Up to about one cm back of mylohyoid ridge.

The mylohyoid muscle attaches to the inner surface of the mandible and extends distally to about one cm behind the mylohyoid ridge. This area plays a significant role in the function and stability of the mandibular denture, especially in preventing displacement during activities such as speaking and chewing. The muscle helps provide support to the denture's fit.

Deepseek

The correct answer is:

c) Up to about one cm short of distal end of mylohyoid ridge.

The mylohyoid muscle attachment extends distally up to about one cm short of the distal end of the mylohyoid ridge. This anatomical detail is important in denture design, as it influences the extension of the lingual flange of the mandibular denture. The denture flange must be carefully shaped to avoid interference with the mylohyoid muscle while ensuring proper retention and stability.

1. In case of extremely resorbed lower ridge, the numbness of lower lip is most probably due to
2. Vitamin deficiency.
3. **Compression of mental nerves and vessels.**
4. Injury of lower lip.
5. All of the above.

ChatGPT

The correct answer is:

b) Compression of mental nerves and vessels.

In cases of extremely resorbed lower ridges, the compression of the mental nerve and vessels is the most probable cause of numbness in the lower lip. As the ridge resorbs, the anatomical structures, including the mental nerve, can become more exposed or compressed by the denture base, leading to paresthesia or numbness in the lower lip. Proper denture design and fit are essential to avoid such complications.

Deepseek

The correct answer is:

b) Compression of mental nerves and vessels.

In the case of an extremely resorbed lower ridge, the numbness of the lower lip is most probably due to compression of the mental nerves and vessels. When the alveolar ridge resorbs significantly, the mental foramen (through which the mental nerve and vessels pass) may become more superficial. An ill-fitting denture can compress these structures, leading to numbness or paresthesia of the lower lip. This is a common clinical consideration when fabricating dentures for patients with severe ridge resorption.

1. If the final impressions are made in tray with no space for impression material, the technique is termed as.
2. Mucostatic impression technique.
3. **Pressure impression technique.**
4. Selective pressure technique.
5. Minimum pressure technique.

ChatGPT

The correct answer is:

a) Mucostatic impression technique.

In the mucostatic impression technique, the impression is made in a tray with no space for impression material, allowing the mucosa to remain in its natural, uncompressed state. This technique aims to capture the tissue details without applying pressure, which can be useful in cases where the goal is to maintain the health of the soft tissues and prevent distortion.

Deepseek

The correct answer is:

c) Selective pressure technique.

The selective pressure technique is the most appropriate method for making impressions for complete dentures. This technique aims to distribute pressure evenly across the primary stress-bearing areas (such as the buccal shelf and retromolar pad in the mandible) while minimizing pressure on non-stress-bearing areas (such as sharp ridges or areas with thin mucosa). It combines elements of both pressure and minimal pressure techniques to achieve optimal support, stability, and retention of the denture.

The other options are less suitable for complete dentures:

a) Mucostatic impression technique: This technique uses minimal pressure and is more suitable for partial dentures or special cases, not complete dentures.

b) Pressure impression technique: This applies uniform pressure and may cause discomfort or damage to sensitive tissues.

d) Minimum pressure technique: This is similar to the mucostatic technique and is not ideal for complete dentures.

Thus, the selective pressure technique is the most widely accepted and clinically effective approach for complete denture fabrication.

1. During final impression procedure by selective pressure technique, the space provided in the custom tray for non-stress bearing area is.
2. Less.
3. **More.**
4. No space provided.
5. None of the above.

ChatGPT

The correct answer is:

b) More.

During the final impression procedure using the selective pressure technique, more space is provided in the custom tray for the non-stress bearing areas. This is because less pressure is applied to these areas during the impression, allowing for more material to capture the softer tissues and avoid distortion. In contrast, stress-bearing areas receive more pressure to ensure accurate recording of the underlying anatomy.

Deepseek

The correct answer is:

b) More.

During the final impression procedure using the selective pressure technique, more space is provided in the custom tray for non-stress-bearing areas. This ensures that minimal or no pressure is applied to these areas, which are often more sensitive or prone to resorption. In contrast, the stress-bearing areas (such as the buccal shelf and retromolar pad in the mandible) are designed to receive more pressure to provide support and stability for the denture. This differential spacing is a key feature of the selective pressure technique.

1. During final impression procedure by selective pressure technique, the space provided in the custom tray for non-stress bearing area is.
2. Less.
3. **More.**
4. No space provided.
5. None of the above.

ChatGPT

The correct answer is:

a) Less.

During the final impression procedure using the selective pressure technique, the space provided in the custom tray for the non-stress bearing area is less. This is because the non-stress bearing areas do not require as much pressure and, therefore, have less space allocated for material compared to the stress-bearing areas, where more space is provided for better support and detail capture.

DeepSeek

The correct answer is:

b) More.

During the final impression procedure using the selective pressure technique, more space is provided in the custom tray for non-stress-bearing areas. This ensures that minimal or no pressure is applied to these areas, which are often more sensitive or prone to resorption. In contrast, the stress-bearing areas (such as the buccal shelf and retromolar pad in the mandible) are designed to receive more pressure to provide support and stability for the denture. This differential spacing is a key feature of the selective pressure technique.

1. Trial denture bases are used for
2. Recording maxilla-mandibular relationships.
3. Arrangement of artificial teeth.
4. Try in appointments.
5. **All of the above.**

ChatGPT

The correct answer is:

**d) All of the above.**

Trial denture bases are used for multiple purposes, including:

- **Recording maxilla-mandibular relationships** during the bite registration process.
- **Arrangement of artificial teeth** to check for proper alignment and esthetics.
- **Try-in appointments** to verify fit, comfort, and esthetics before the final denture is processed.

DeepSeek

The correct answer is:

d) All of the above.

Trial denture bases are used for:

a) Recording maxilla-mandibular relationships: They help establish proper jaw relations, such as centric relation and vertical dimension.

b) Arrangement of artificial teeth: They provide a stable base for setting up teeth in wax for evaluation.

c) Try-in appointments: They allow the patient and clinician to assess the fit, aesthetics, and function of the denture before final processing.

Thus, trial denture bases serve all these purposes, making d) All of the above the correct answer

1. Which of the following is temporary recording base material?
2. **Vinyl or polystyrene.**
3. Heat cured acrylic resin.
4. Gold.
5. Base metal alloys.

ChatGPT

The correct answer is:

a) Vinyl or polystyrene.

Vinyl or polystyrene are commonly used as temporary recording base materials due to their ease of manipulation and ability to provide a temporary base for impressions or trial dentures. Other options like heat-cured acrylic resin, gold, and base metal alloys are typically used for more permanent structures or frameworks.

DeepSeek

The correct answer is:

a) Vinyl or polystyrene

Vinyl or polystyrene is commonly used as a temporary recording base material in dentistry. These materials are easy to manipulate, cost-effective, and suitable for short-term use during the fabrication of dental prostheses.

The other options are incorrect:

b) Heat-cured acrylic resin: This is used for permanent denture bases, not temporary ones.

c) Gold: This is a permanent material used for crowns, bridges, and other restorations, not for temporary recording bases.

d) Base metal alloys: These are used for permanent frameworks in prosthodontics, not for temporary recording bases.

Thus, a) Vinyl or polystyrene is the correct answer.

1. Which of the following need/s refractory cast for fabrication of recording bases?
2. Heat cured acrylic resin
3. Shellac base plate
4. **Cast alloys**
5. Polystyrene

ChatGPT

The correct answer is:

a) Heat cured acrylic resin

A refractory cast is typically used for the fabrication of recording bases when using heat-cured acrylic resin. The refractory cast is essential in this process because it provides the necessary support and allows the resin to be processed at high temperatures without distortion.

Other materials like shellac base plate, cast alloys, and polystyrene do not typically require the use of a refractory cast in their fabrication process.

DeepSeek

The correct answer is:

**a) Heat cured acrylic resin**

**A refractory cast is typically used for the fabrication of recording bases when using heat-cured acrylic resin. The refractory cast is essential in this process because it provides the necessary support and allows the resin to be processed at high temperatures without distortion.**

**Other materials like shellac base plate, cast alloys, and polystyrene do not typically require the use of a refractory cast in their fabrication process.**.

1. The occlusal plane of occlusal rims should be parallel to
2. Camper line
3. Interpupillary line
4. **Both of the above**
5. None of the above

ChatGPT

The correct answer is:

c) Both of the above

The occlusal plane of occlusal rims should be parallel to both the Camper line (ala-tragus line) and the interpupillary line. This ensures proper alignment and balance in the construction of dentures.

DeepSeek

The correct answer is:

c) Both of the above

The occlusal plane of occlusal rims should be parallel to both the Camper line (ala-tragus line) and the interpupillary line. This ensures proper alignment and balance in the construction of dentures.

1. Corners of the mouth provide anterior stable landmarks for the height of
2. Maxillary first premolar
3. **Mandibular first premolar**
4. Maxillary canine
5. Mandibular canine

ChatGPT

The correct answer is:

d) Mandibular canine

The corners of the mouth provide stable anterior landmarks for the height of the mandibular canine. This is important for establishing the correct vertical position of the lower teeth in relation to the upper teeth during denture fabrication. The position of the mandibular canine plays a key role in achieving proper occlusion and aesthetics.

DeepSeek

The correct answer is:

c) Maxillary canine

The corners of the mouth provide anterior stable landmarks for determining the height of the maxillary canine. The position of the maxillary canine is critical for aesthetics and function, as it supports the corner of the mouth and influences the overall appearance of the smile.

The other options are incorrect:

a) Maxillary first premolar: This tooth is located posteriorly and is not directly related to the corners of the mouth.

b) Mandibular first premolar: This tooth is also located posteriorly and does not serve as a landmark for the height of the corners of the mouth.

d) Mandibular canine: While important, the mandibular canine is not the primary landmark for the height of the corners of the mouth.

Thus, c) Maxillary canine is the correct answer.

1. The level of occlusal plane of which of the following is at the junction of inferior two third and superior one third of retromolar pad:
2. Maxillary first molar
3. **Mandibular first molar**
4. Mandibular second molar
5. Maxillary second molar

ChatGPT

The correct answer is:

c) Maxillary canine

The corners of the mouth are often used as stable landmarks for the placement of the maxillary canine when constructing dentures or during restorative procedures. The maxillary canine is positioned at the level of the corner of the mouth, which helps in achieving proper alignment and esthetics.

This reference point helps in determining the appropriate height and positioning of the upper teeth to ensure both function and appearance are optimal.

DeepSeek

The correct answer is:

b) Mandibular first molar

The level of the occlusal plane for the mandibular first molar is typically at the junction of the inferior two-thirds and superior one-third of the retromolar pad. This is an important landmark in dental prosthetics and occlusion.

58. The Silverman's space for most class-I patients is about:

1. Larger than 3mm
2. **1.5 to 3mm**
3. Smaller than1.5mm
4. 4mm

ChatGPT

The correct answer is:

b) 1.5 to 3mm

Silverman's space refers to the space available between the maxillary and mandibular arches, often used in denture fabrication to ensure proper function and comfort. For most Class I patients, the space typically falls within the range of 1.5 to 3mm. This allows for the proper alignment and positioning of the denture teeth for optimal occlusion and function.

DeepSeek

The correct answer is:

b) 1.5 to 3mm

Silverman's space, also known as the interocclusal clearance or freeway space, is the space between the upper and lower teeth when the mandible is in its resting position. For most Class I patients, this space is typically 1.5 to 3mm. This space is important in prosthodontics and occlusal considerations to ensure proper function and comfort.

59. The ideal height of anterior maxillary occlusion rim from the reflection of the cast should be-approximately:

1. 18mm
2. 24mm
3. **22mm**
4. 16mm

ChatGPT

The ideal height of the anterior maxillary occlusion rim from the reflection of the cast is approximately:

b) 24mm

DeepSeek

The correct answer is:

c) 22mm

The ideal height of the anterior maxillary occlusion rim from the reflection of the cast is approximately 22mm. This measurement is used as a guideline during the fabrication of complete dentures to ensure proper esthetics, phonetics, and function. The height is measured from the maxillary cast's reflection (mucosal margin) to the incisal edge of the occlusion rim.

60. The ideal height of anterior mandibular occlusion rim from the reflection of the cast should be approximately:

1. 22mm
2. **16mm**
3. 20mm
4. 24mm

ChatGPT

The ideal height of the anterior mandibular occlusion rim from the reflection of the cast should be approximately:

b) 16mm

DeepSeek

The correct answer is:

b) 16mm

The ideal height of the anterior mandibular occlusion rim from the reflection of the cast is approximately 16mm. This measurement is used as a guideline during the fabrication of complete dentures to ensure proper esthetics, phonetics, and function. The height is measured from the mandibular cast's reflection (mucosal margin) to the incisal edge of the occlusion rim.

61. The level of maxillary occlusal rim in the first molar area should be below the Stensen duct by approximately:

1. 3mm
2. 2mm
3. **6mm**
4. 4mm

ChatGPT

The correct answer is:

d) 4mm

The level of the maxillary occlusal rim in the first molar area should be approximately 4mm below the Stensen's duct (parotid papilla). This ensures proper clearance for the duct and avoids interference with salivary flow, which is important for the comfort and function of the denture.

DeepSeek

The level of the maxillary occlusal rim in the first molar area should be below the Stensen duct by approximately:

b) 2mm

62. Which of the following can locate the axis of mandibular rotation in saggital plane ?

1. vertical jaw lotion
2. horizontal jaw relation
3. **orientation jaw relation**
4. centric relation

ChatGPT

The option that can locate the axis of mandibular rotation in the sagittal plane is:

b) horizontal jaw relation

DeepSeek

The correct answer is:

d) centric relation

The centric relation is the position of the mandible when the condyles are in their most superior and posterior position in the glenoid fossa, with the articular disc properly interposed. This position helps locate the axis of mandibular rotation in the sagittal plane. It is a key concept in prosthodontics and occlusion for establishing proper jaw relationships.

The other options (vertical jaw relation, horizontal jaw relation, and orientation jaw relation) are not directly related to locating the axis of mandibular rotation in the sagittal plane.

63. Which of the following is related to jaw separation?

1. orientation relation
2. horizontal relation
3. centric relation
4. **vertical relation**

ChatGPT

The option related to jaw separation is:

d) vertical relation

DeepSeek

The correct answer is:

d) vertical relation

The vertical relation refers to the distance between the maxilla and mandible when the teeth are not in contact (jaw separation). It is a critical aspect of dental prosthetics and occlusion, as it determines the vertical dimension of occlusion (VDO) and rest position. Proper vertical relation ensures comfort, function, and esthetics in denture fabrication and restorative dentistry.

The other options:

Orientation relation: Determines the plane of occlusion and facial orientation.

Horizontal relation: Refers to the anteroposterior and lateral positioning of the mandible relative to the maxilla.

Centric relation: Describes the position of the mandible when the condyles are in their most superior and posterior position in the glenoid fossa.

64. Rotation of condyles takes place in

1. upper compartment of TMJ
2. condyles don’t rotate in TMJ
3. **lower compartment of TMJ**
4. both compartments of TMJ

ChatGPT

The rotation of condyles takes place in:

(c) lower compartment of TMJ

DeepSeek

The correct answer is:

(c) lower compartment of TMJ

Rotation of the condyles primarily occurs in the lower compartment of the temporomandibular joint (TMJ). The TMJ is divided into two compartments by the articular disc:

The upper compartment is involved in translational (gliding) movements of the jaw.

The lower compartment is responsible for rotational movements, such as during the initial opening of the mouth.

Thus, rotation of the condyles occurs in the lower compartment, while translation occurs in the upper compartment.

65. Facebow is used to record the

1. vertical relation
2. **opening axis hinge axis**
3. eccentric relation
4. centric relation

ChatGPT

Facebow is used to record the:

d) centric relation

DeepSeek

The correct answer is:

b) opening axis hinge axis

The facebow is used to record the hinge axis (or opening axis) of the mandible, which is the axis around which the mandible rotates when opening and closing in a purely rotational movement. This helps in transferring the spatial relationship of the maxilla to the hinge axis of the mandible to an articulator, ensuring accurate reproduction of jaw movements.

The other options:

Vertical relation: Refers to the distance between the maxilla and mandible, not recorded by a facebow.

Eccentric relation: Refers to jaw positions outside of centric relation, not recorded by a facebow.

Centric relation: The most posterior and superior position of the mandible, not directly recorded by a facebow.

66. At which of the following distances from the true opening axis of the condylar rods of arbitrary Facebow are placed

1. within 4 mm
2. within 6 mm
3. **within 5 mm**
4. within 3 mm

ChatGPT

The condylar rods of the arbitrary Facebow are placed at a distance of:

b) within 6 mm

DeepSeek

The correct answer is:

c) within 5 mm

In an arbitrary facebow, the condylar rods are typically placed within 5 mm of the true hinge axis (opening axis) of the condyles. This approximation is considered clinically acceptable for most prosthetic and restorative procedures, as it provides sufficient accuracy for mounting casts on an articulator without requiring a more complex kinematic facebow recording.

The other options (3 mm, 4 mm, and 6 mm) are not the standard distances used for arbitrary facebow placement.

67. Which of the following determines the arbitrary access within 2 mm of true centre of opening axis of mandible?

1. Whip-mix Facebow
2. **Hanau Facebow**
3. Arbitrary facebow
4. Denar slidematic facebow

ChatGPT

The option that determines the arbitrary axis within 2 mm of the true center of the opening axis of the mandible is:

c) Arbitrary facebow

DeepSeek

The correct answer is:

d) Denar Slidematic Facebow

The Denar Slidematic Facebow is designed to locate the hinge axis of the mandible with high precision, typically within 2 mm of the true center of the opening axis. This facebow is known for its accuracy and is often used in more precise prosthetic and restorative procedures.

The other options:

Whip-mix Facebow: An arbitrary facebow that approximates the hinge axis but is not as precise as the Denar Slidematic.

Hanau Facebow: Another arbitrary facebow that does not guarantee the same level of accuracy.

Arbitrary Facebow: Generally less precise and does not consistently locate the hinge axis within 2 mm.

68. The facebow scale of Denar slidematic facebow represents

1. **half the patients intercondylar distance**
2. patients intercondylar distance
3. double the patients intercondylar distance
4. one fourth of the patients intercondylar distance

ChatGPT

The facebow scale of the Denar slidematic facebow represents:

c) double the patient's intercondylar distance

DeepSeek

The correct answer is:

a) half the patient's intercondylar distance

The Denar Slidematic Facebow scale represents half the patient's intercondylar distance. This design allows for accurate transfer of the spatial relationship of the maxilla to the hinge axis of the mandible, ensuring precise mounting of casts on an articulator. The facebow is calibrated to account for this relationship, making it a highly accurate tool in prosthodontics.

69. Multiple transfer jigs may be used with only one

1. Hanau Facebow
2. Whipmix Facebow
3. **Slidematic Facebow**
4. Kinematic Facebow

ChatGPT

Multiple transfer jigs may be used with only one:

c) Slidematic Facebow

DeepSeek

The correct answer is:

c) Slidematic Facebow

The Denar Slidematic Facebow is designed to allow the use of multiple transfer jigs with a single facebow. This feature enhances its versatility and efficiency in recording and transferring jaw relationships to an articulator. The other facebows listed (Hanau, Whipmix, and Kinematic) do not typically support the use of multiple transfer jigs in the same way.

70. Which of the following remains relatively constant for reasonable length of time

1. centric relation
2. **physiologic rest position of mandible**
3. horizontal relation
4. eccentric relation

ChatGPT

The option that remains relatively constant for a reasonable length of time is:

a) centric relation.

Centric relation is the maxillomandibular relationship in which the condyles articulate with the thinnest avascular portion of the fibrocartilage with the complex interarticular tissues. It is considered a bone-to-bone relationship and may remain stable over time, making it a reliable reference point in dentistry and occlusion studies.

The other relations listed can vary due to different factors such as muscle tone, dental changes, and overall jaw positioning.

DeepSeek

The correct answer is:

b) physiologic rest position of mandible

The physiologic rest position of the mandible remains relatively constant for a reasonable length of time. This position is determined by the balance of the muscles of mastication and is not significantly affected by changes in tooth position or occlusion. It is used as a reference point in prosthodontics to establish the vertical dimension of occlusion.

The other options:

Centric relation: Can change due to factors like condylar position, joint pathology, or muscle adaptation.

Horizontal relation: Refers to the anteroposterior and lateral positioning of the mandible, which can vary with changes in occlusion or tooth position.

Eccentric relation: Refers to jaw positions outside of centric relation and is not constant.

71. In cases of narrow knife edge ridges, complete dentures become more comfortable if made with

1. decreased Inter occlusion distance
2. increased inter arch distance
3. **increased Interocclusal distance**
4. decreased average speaking space

ChatGPT

In cases of narrow knife-edge ridges, complete dentures become more comfortable if made with:

**b) increased inter-arch distance.**

Increased inter-arch distance helps to stabilize the dentures and distribute occlusal forces more evenly, which can enhance comfort for the patient, particularly in situations where the supporting ridge is narrow. This approach helps to minimize the discomfort that can arise from the lack of adequate support from the underlying bone.

DeepSeek

The correct answer is:

a) decreased interocclusal distance

In cases of narrow knife-edge ridges, complete dentures become more comfortable if made with a decreased interocclusal distance. Reducing the interocclusal distance lowers the vertical dimension of occlusion, which decreases the pressure on the narrow ridges and improves stability and comfort for the patient.

The other options:

Increased interarch distance: Would increase the vertical dimension, making the dentures less stable on narrow ridges.

Increased interocclusal distance: Would also increase the vertical dimension, leading to discomfort and instability.

Decreased average speaking space: This is not directly related to improving comfort for narrow knife-edge ridges.

72. in natural dentition the incisal edges of mandibular anterior teeth are vertically apart from the incissive papilla by approximately

1. 2 mm
2. **4 mm**
3. 3 mm
4. 5 mm

ChatGPT

In natural dentition, the incisal edges of mandibular anterior teeth are vertically apart from the incisal papilla by approximately:

**c) 3 mm.**

This measurement is typically used as a reference point in dental procedures and is important for achieving proper occlusion and aesthetics in dental restorations or prosthetics

DeepSeek

The correct answer is:

d) 5 mm

In natural dentition, the incisal edges of the mandibular anterior teeth are typically approximately 5 mm vertically apart from the incisive papilla. This measurement is often used as a guideline in prosthodontics when setting up anterior teeth for complete dentures to ensure proper esthetics and function.

The other options (2 mm, 3 mm, and 4 mm) are not the standard distances observed in natural dentition.

73. Facebow is used for

1. **recording of orientation relation**
2. recording of vertical relation
3. recording of horizontal relation
4. recording of all 3 relations

ChatGPT

The correct answer is:

a) recording of orientation relation

A facebow is primarily used in dentistry to record the spatial relationship of the maxillary arch to the temporomandibular joint (TMJ) for the purpose of transferring this relationship to an articulator. This helps in setting up dental prosthetics accurately.

DeepSeek

The correct answer is:

a) recording of orientation relation

The facebow is primarily used for recording the orientation relation of the maxilla to the hinge axis of the mandible. This helps in transferring the spatial relationship of the maxilla to an articulator, ensuring proper alignment of the occlusal plane and accurate reproduction of jaw movements.

The facebow does not directly record:

Vertical relation: This is determined by measuring the interocclusal distance or vertical dimension of occlusion.

Horizontal relation: This refers to the anteroposterior and lateral positioning of the mandible, which is recorded using other methods like centric relation records.

Thus, the facebow is specifically used for recording the orientation relation.

74. Decrease in vertical dimension of the occlusion results in (verified)

1. increased muscle tone
2. **decreased muscle tone**
3. A firm appearance instead of flabbiness of face
4. decreases wrinkles of face

ChatGPT

The correct answer is:

b) decreased muscle tone

A decrease in the vertical dimension of occlusion can lead to a loss of support for the facial muscles, resulting in a decrease in muscle tone. This can cause the face to appear more sunken or "flabby," as the muscles no longer have the same level of support.

DeepSeek

The correct answer is:

a) increased muscle tone

A decrease in the vertical dimension of occlusion (the vertical height between the upper and lower jaws when the teeth are in contact) often leads to increased muscle tone. This is because the muscles of mastication (such as the masseter and temporalis) are forced to work harder to maintain contact between the upper and lower teeth, resulting in increased muscle activity and tone.

The other options are not typically associated with a decrease in vertical dimension:

b) Decreased muscle tone is incorrect because the muscles tend to work harder, not less.

c) A firm appearance instead of flabbiness of face is not directly related to a decrease in vertical dimension. In fact, a reduced vertical dimension can lead to a collapsed appearance of the face.

d) Decreases wrinkles of face is also incorrect, as a decrease in vertical dimension can often lead to more pronounced wrinkles due to loss of facial support.

75. Which of the following is not a mechanical method for determining the vertical maxillomandibular relations

1. parallelism of the ridges
2. pre extraction records
3. measurement of the former dentures
4. **phonetics and aesthetics**

ChatGPT

The correct answer is:

d) phonetics and aesthetics

Phonetics and aesthetics are not mechanical methods for determining the vertical maxillomandibular relations. These are more subjective or clinical methods based on the patient's speech and facial appearance.

On the other hand, parallelism of the ridges, pre-extraction records, and measurement of former dentures are mechanical methods used to help determine the vertical relation in the maxillomandibular arch.

DeepSeek

The correct answer is:

d) phonetics and aesthetics

Phonetics and aesthetics are physiological and functional methods for determining vertical maxillomandibular relations, not mechanical methods. They rely on the patient's speech, facial appearance, and functional harmony rather than physical measurements or records.

The other options are mechanical methods:

a) Parallelism of the ridges: This involves assessing the alignment of the maxillary and mandibular ridges.

b) Pre-extraction records: These include measurements or models taken before teeth were extracted.

c) Measurement of the former dentures: This involves using the patient's previous dentures as a reference for vertical dimension.

Thus, d) phonetics and aesthetics is not a mechanical method.

76. On an average the interocclusal gap at rest position in premolar area is

1. 1-2 mm
2. **2-4 mm**
3. 4-6 mm
4. 6-8 mm

ChatGPT

The correct answer is:

a) 1-2 mm

On average, the interocclusal gap (the space between the upper and lower teeth when the jaw is at rest) in the premolar area is about 1-2 mm. This gap can vary depending on individual anatomical features, but 1-2 mm is considered typical.

DeepSeek

The correct answer is:

b) 2-4 mm

On average, the interocclusal gap (the space between the upper and lower teeth when the jaw is at rest) in the premolar area is typically 2-4 mm. This is considered the normal physiological rest position for most individuals.

The other options are incorrect because:

a) 1-2 mm: This is too small and does not represent the average interocclusal gap.

c) 4-6 mm: This is larger than the typical range.

d) 6-8 mm: This is excessive and not within the normal range for the interocclusal gap.

77. Centric occlusion is

1. **1 mm anterior to centric relation**
2. 2 mm anterior to centric relation
3. 3 mm anterior to centric relation
4. 4 mm anterior to centric relation

ChatGPT

The correct answer is:

The correct answer is:

a) 1 mm anterior to centric relation

Centric occlusion is typically about 1 mm anterior to the centric relation, although it can vary slightly depending on individual anatomy and occlusion.

DeepSeek

The correct answer is:

a) 1 mm anterior to centric relation

Explanation:

Centric occlusion (CO) refers to the maximum intercuspation of the teeth, where the teeth fit together in the most stable and repeatable position.

Centric relation (CR) is a reproducible, bone-based position where the condyles are in their most superior and anterior position against the articular eminences, with the disc properly interposed.

In healthy dentitions, centric occlusion is typically about 1 mm anterior to centric relation in the sagittal plane.

The other options (2 mm, 3 mm, 4 mm) are not considered standard physiological positions.

78. Lateral condylar path inclination is approximately

1. 10°
2. **15°**
3. 33°
4. 30°

ChatGPT

The correct answer is:

b) 15°

The lateral condylar path inclination is typically around 15°. This refers to the angle at which the condyle moves within the mandibular fossa during lateral movement, which is important for setting up articulators in prosthetic dentistry.

DeepSeek

The correct answer is:

c) 33°

The lateral condylar path inclination (the angle at which the condyle moves laterally during mandibular movements) is approximately 33° on average. This angle can vary slightly among individuals, but 33° is the generally accepted average value.

The other options are incorrect because:

a) 10°: This is too shallow and does not represent the average lateral condylar path inclination.

b) 15°: This is also too shallow.

d) 30°: While close, this is slightly lower than the average value of 33°.

79. Which of the following is an intra oral tracing device?

1. fork
2. **coble device**
3. hinge bow
4. locking device

ChatGPT

The correct answer is:

b) Coble device

The Coble device is an intraoral tracing device used to record the movements of the mandible, specifically during the determination of the horizontal and vertical jaw relations. It is used in cases where more precise recordings of mandibular movements are required, such as in the setting of a semi-adjustable articulator.

The other options listed are not intraoral tracing devices.

DeepSeek

The correct answer is:

b) Coble device

The Coble device is an intraoral tracing device used in dentistry to record mandibular movements and assist in determining the centric relation. It is commonly used in prosthodontics for accurate jaw relation records.

The other options are not intraoral tracing devices:

a) Fork: This is not a tracing device; it is typically used in facebow transfers.

c) Hinge bow: This is an extraoral device used to transfer the hinge axis of the mandible to an articulator.

d) Locking device: This is not related to intraoral tracing or jaw relation records.

Thus, the Coble device is the correct answer.

80. Jaw movements are studied by

1. myography
2. electromyography
3. **pantograph**
4. sialography

ChatGPT

The correct answer is:

c) pantograph

A pantograph is an instrument used to study jaw movements, especially the mandibular movements during mastication. It helps record and analyze the movement paths of the jaw.

Myography and electromyography are used to measure muscle activity, not jaw movements specifically.

Sialography is an imaging technique for studying the salivary glands.

DeepSeek

The correct answer is:

c) pantograph

A pantograph is a device used to study and record jaw movements, particularly the mandibular movements in three dimensions. It is commonly used in dentistry to analyze the functional movements of the jaw and to program articulators for prosthetic fabrication.

The other options are not primarily used for studying jaw movements:

a) Myography: This is used to study muscle activity and contractions, not specifically jaw movements.

b) Electromyography (EMG): This measures the electrical activity of muscles, including those involved in jaw movement, but it does not directly study the jaw's movement patterns.

d) Sialography: This is an imaging technique used to study the salivary glands and ducts, not jaw movements.

Thus, the pantograph is the correct answer.

81. The lateral movement of the mandible is known as

1. bent shift
2. Benne shift
3. Benet shift
4. **Bennett shift**

ChatGPT

The correct answer is:

d) Bennett shift

The Bennett shift refers to the lateral movement of the mandible during the working side of a lateral excursion. It is an important concept in occlusion, describing the movement of the mandibular condyle on the non-working side as the jaw shifts laterally.

DeepSeek

The correct answer is:

d) Bennett shift

The Bennett shift refers to the lateral movement of the mandible during sideward (lateral) jaw movements. It is a component of mandibular motion that occurs during mastication and other functional movements. This term is commonly used in dentistry, particularly in the context of articulator settings and occlusal analysis.

The other options are incorrect:

a) Bent shift: Not a recognized term in dentistry.

b) Benne shift: Not a recognized term in dentistry.

c) Benet shift: Not a recognized term in dentistry.

Thus, the correct term is d) Bennett shift.

82. The Bennett shift is approximately

1. 5°
2. **15°**
3. 25°
4. 35°

ChatGPT

The correct answer is:

**a) 5°**

The **Bennett shift** is typically around **5°**. It refers to the lateral movement of the mandible on the non-working side during a lateral excursion. This shift is an important concept in occlusion, especially in the setup of dentures and when adjusting articulators for proper jaw movement.

DeepSeek

The correct answer is:

**b) 15°**

The **Bennett shift** (also known as the **immediate side shift**) is approximately **15°** on average. This refers to the lateral movement of the mandible during the initial phase of a lateral excursion. It is an important factor in occlusal dynamics and is considered when setting articulators for prosthetic fabrication.

The other options are incorrect because:

- **a) 5°**: This is too small and does not represent the average Bennett shift.
- **c) 25°**: This is too large and exceeds the typical range.
- **d) 35°**: This is excessive and not within the normal range for the Bennett shift.

83. In the selection of the artificial teeth, which of the following should be selected first? (verified)

1. **color of the tooth**
2. size of the tooth
3. mold of the tooth
4. all off the above

ChatGPT

The correct answer is:

b) size of the tooth

When selecting artificial teeth for dentures, the size of the teeth is generally selected first, as it is critical to match the size and shape of the teeth to the patient's natural oral anatomy. After determining the correct size, the mold and color can be selected to ensure the teeth look natural and fit well with the patient's features.

DeepSeek

The correct answer is:

b) size of the tooth

Explanation:

When selecting artificial teeth for dentures, the size of the tooth should be selected first because it is determined by:

The available ridge space (distance between the maxillary and mandibular ridges).

The patient’s facial proportions (to maintain proper esthetics and function).

After selecting the appropriate size, the mold (shape) and color of the teeth are chosen to match the patient’s natural appearance and facial features.

So, the correct sequence is:

Size (most critical for function and fit)

Mold (shape and arrangement)

Color (esthetic harmony with the patient’s complexion)

Thus, option (b) is correct—the size of the tooth should be selected first.

84. Which of the following teeth should be used in the patient with highly visible gingiva?

1. highly tapered teeth
2. square teeth
3. square teeth with small contact point
4. **square teeth with long contact point**

ChatGPT

The correct answer is:

b) square teeth

For a patient with highly visible gingiva, square teeth are often recommended because their shape can help provide a more natural and harmonious appearance, blending well with the patient's natural gum line. These teeth have a more flat and broad contour, which tends to mimic natural teeth and enhances esthetics, especially in the presence of a visible gingival margin.

DeepSeek

The correct answer is:

d) square teeth with long contact point

In patients with highly visible gingiva, square teeth with a long contact point are often recommended. This design helps create the illusion of shorter teeth and minimizes the appearance of excessive gingival display. The long contact point extends the visible area of the teeth, making the gums appear less prominent.

The other options are less suitable:

a) Highly tapered teeth: These can make the gingiva appear even more visible and are not ideal for this situation.

b) Square teeth: While square teeth are better than tapered teeth, they lack the long contact point that helps reduce the visibility of the gingiva.

c) Square teeth with small contact point: A small contact point does not effectively address the issue of highly visible gingiva.

Thus, d) square teeth with long contact point is the best choice.

85. Which of the following types of teeth should be used in dentures opposing natural dentition

1. porcelain
2. ceramic
3. **acrylic**
4. metallic

ChatGPT

The correct answer is:

c) acrylic

Acrylic teeth are typically used in dentures opposing natural dentition. This is because acrylic teeth are softer than porcelain or ceramic teeth, which helps prevent excessive wear on the natural teeth. Additionally, acrylic teeth provide better adaptation and flexibility when opposing natural dentition, making them a more suitable choice for such situations.

DeepSeek

The correct answer is:

c) acrylic

Acrylic teeth are typically recommended for dentures that oppose natural dentition. This is because acrylic teeth are softer and less abrasive than porcelain or ceramic teeth, which helps protect the natural teeth from excessive wear. Additionally, acrylic teeth are easier to adjust and are more forgiving in terms of occlusal forces.

The other options are less suitable:

a) Porcelain: Porcelain teeth are harder and can cause excessive wear on natural teeth.

b) Ceramic: Similar to porcelain, ceramic teeth are also hard and can lead to wear of the opposing natural dentition.

d) Metallic: Metallic teeth are not typically used in dentures and would be highly abrasive to natural teeth.

Thus, c) acrylic is the best choice for dentures opposing natural dentition.

86. Which of the following teeth are desirable when the tooth must be excessively reduced in height because of small interarch distance?

1. porcelain teeth
2. ceramic teeth
3. **acrylic teeth**
4. metallic teeth

ChatGPT

The correct answer is:

c) acrylic teeth

Acrylic teeth are desirable when a tooth must be excessively reduced in height due to a small interarch distance. Acrylic teeth are more easily adjusted and can be reduced in height without compromising their integrity, making them a practical choice for situations where space is limited between the upper and lower arches.

DeepSeek

The correct answer is:

d) metallic teeth

When the tooth must be excessively reduced in height due to a small interarch distance, metallic teeth (often gold or metal occlusal surfaces) are desirable. Metallic teeth are strong and can be made very thin while still maintaining durability and function. This makes them ideal for situations where space is limited.

The other options are less suitable:

a) Porcelain teeth: These require more bulk to maintain strength and are not ideal for situations where height reduction is necessary.

b) Ceramic teeth: Similar to porcelain, ceramic teeth also require more bulk and are not suitable for excessive reduction.

c) Acrylic teeth: Acrylic teeth are softer and wear more easily, making them less ideal for situations where they need to be reduced in height.

Thus, d) metallic teeth is the best choice for this scenario.

87. The incisal edge of the maxillary Central incisor should be

1. at the wax occlusal rim level
2. **0.5 mm below the wax occlusal rim level**
3. 2 mm below the wax occlusal rim level
4. 3 mm below the wax occlusal rim level

ChatGPT

The correct answer is:

**a) at the wax occlusal rim level**

The incisal edge of the maxillary central incisor should be positioned at the **wax occlusal rim level**. This helps achieve proper esthetics and function during denture setup. The wax occlusal rim serves as a guide to align the teeth in a way that is both functional and aesthetically pleasing.

DeepSeek

The correct answer is:

c) 2 mm below the wax occlusal rim level

The incisal edge of the maxillary central incisor should typically be positioned 2 mm below the wax occlusal rim level. This placement ensures proper aesthetics, phonetics, and function. It allows for adequate space for the lower incisors during occlusion and provides a natural appearance when the patient smiles.

The other options are incorrect:

a) At the wax occlusal rim level: This would place the incisal edge too high, potentially affecting aesthetics and function.

b) 0.5 mm below the wax occlusal rim level: This is too close to the rim and may not provide enough space for proper occlusion.

d) 3 mm below the wax occlusal rim level: This is too low and may result in an unaesthetic appearance or functional issues.

Thus, c) 2 mm below the wax occlusal rim level is the correct answer.

88. Protrusive jaw relation is a

A Horizontal Jaw Relation

B centric jaw relation

**C Eccentric jaw relations.**

D none of the mentioned option

ChatGPT

The correct answer is:

C) Eccentric jaw relations.

Explanation:

Protrusive jaw relation refers to the relationship between the upper and lower jaws when the lower jaw is moved forward (protruded) from the centric position. This is an eccentric jaw relation because the jaws are in motion away from the centric position.

Why the other options aren't correct:

A) Horizontal jaw relation: This refers to the relationship of the jaws in the horizontal plane, but protrusive relation is specifically a movement of the jaw forward, not strictly a horizontal relation in its entirety.

B) Centric jaw relation: This is the relationship when the jaws are in their most stable position (centric occlusion), typically not involving any movement.

D) None of the mentioned options: This is incorrect because "eccentric jaw relations" is the correct category for protrusive jaw relation.

So, protrusive jaw relation is an eccentric jaw relation

DeepSeek

Final Answer:

C) Eccentric jaw relations.

Explanation:

Protrusive jaw relation occurs when the mandible moves forward from the centric position, making it an eccentric (non-centric) jaw relation.

Eccentric relations include protrusive, retrusive, and lateral movements of the mandible.

Why the Other Options Are Incorrect:

A) Horizontal jaw relation – While protrusion involves horizontal movement, this term is too broad and does not specifically define a forward mandibular position.

B) Centric jaw relation – This refers to the most stable, retruded position of the mandible (not a forward movement).

D) None of the mentioned options – Incorrect, as eccentric jaw relations is the correct classification.

Thus, protrusive jaw relation is best categorized as an eccentric jaw relation (C).

89. The neutral zone was given by

1. Graber
2. Angle
3. **Fish**
4. Jhonson

ChatGPT

The correct answer is:

c) Fish

The neutral zone concept was introduced by Dr. Edward B. Fish. It refers to the area in the mouth where the forces of the tongue and lips are in balance, and it plays a crucial role in the stability and retention of dentures. Properly positioning the teeth within the neutral zone helps achieve better comfort and function for the patient.

DeepSeek

The correct answer is:

c) Fish

The concept of the neutral zone was introduced by E.W. Fish. The neutral zone refers to the potential space between the lips and cheeks on one side and the tongue on the other, where the forces exerted by the musculature are balanced. This concept is important in prosthodontics for designing dentures that are in harmony with the surrounding oral musculature.

The other options are incorrect:

a) Graber: Known for his work in orthodontics, not the neutral zone.

b) Angle: Known for his classification of malocclusion, not the neutral zone.

d) Jhonson: Not associated with the concept of the neutral zone.

Thus, c) Fish is the correct answer.

90. Which of the following mandibular teeth should be placed last during setting of mandibular posterior teeth according to setting of maxillary teeth

1. **mandibular first premolar**
2. mandibular second premolar
3. mandibular first molar
4. mandibular second molar

ChatGPT

The correct answer is:

a) mandibular first premolar

According to the traditional method of setting posterior teeth, the mandibular first premolar should be placed last during the setting of the mandibular posterior teeth. This is because the maxillary posterior teeth are set first, and then the mandibular teeth are arranged to ensure proper occlusion and alignment with the maxillary teeth. The first premolar is placed last to allow for accurate adjustments and positioning of the other posterior teeth.

DeepSeek

The correct answer is:

d) mandibular second molar

When setting mandibular posterior teeth in relation to the maxillary teeth, the mandibular second molar is typically placed last. This is because the position of the mandibular second molar is determined by the alignment of the other teeth and the occlusal plane. Placing it last ensures proper occlusion and alignment with the maxillary teeth.

The other options are incorrect:

a) Mandibular first premolar: This is usually set earlier in the process.

b) Mandibular second premolar: This is also set earlier, following the first premolar.

c) Mandibular first molar: This is set before the second molar but after the premolars.

Thus, d) mandibular second molar is the correct answer.

91. The minimum amount of protrusion for condylar guidance advancement is

1. 3 mm
2. **6 mm**
3. 9 mm
4. 12 mm

ChatGPT

The correct answer is:

a) 3 mm

The minimum amount of protrusion for condylar guidance advancement is typically 3 mm. This amount of advancement helps in achieving proper anterior guidance and occlusion in full dentures, ensuring that the teeth have an adequate range of movement while maintaining stability during functional movements.

DeepSeek

The correct answer is:

b) 6 mm

The minimum amount of protrusion required for setting condylar guidance on an articulator is typically 6 mm. This protrusion allows for an accurate recording of the condylar path inclination, which is essential for proper articulation of the denture teeth.

The other options are incorrect:

a) 3 mm: This is insufficient to accurately determine the condylar guidance.

c) 9 mm: This is more than the minimum required.

d) 12 mm: This is excessive and not necessary for setting condylar guidance.

Thus, b) 6 mm is the correct answer.

92. When the posterior palatal seal is made too wide (usual wdith is 1-1.5 mm) it will result in

1. greater stability of the denture
2. greater retention of the denture
3. **downward displacement of the denture**
4. upward dispacement of the denture

ChatGPT

The correct answer is:

c) downward displacement of the denture

When the posterior palatal seal is made too wide, it can create excessive pressure in the posterior region, which may lead to downward displacement of the denture. This is because the seal can compress the tissues too much, causing instability and discomfort. The typical width for the posterior palatal seal is around 1-1.5 mm to ensure proper retention without causing these issues.

DeepSeek

The correct answer is:

c) downward displacement of the denture

When the posterior palatal seal is made too wide (beyond the usual width of 1-1.5 mm), it can create excessive pressure on the soft tissues. This can lead to downward displacement of the denture during function, as the seal interferes with the proper seating of the denture on the palate.

The other options are incorrect:

a) Greater stability of the denture: A properly placed posterior palatal seal improves stability, but an overly wide seal can destabilize the denture.

b) Greater retention of the denture: Retention is improved with a correctly placed seal, but an excessively wide seal can compromise retention.

d) Upward displacement of the denture: This is not a typical result of an overly wide posterior palatal seal.

Thus, c) downward displacement of the denture is the correct answer.

93. Which of the following muscles does not merge with orbicularis oris muscle

1. zygomaticus major
2. caninus
3. mentalis
4. **masseter**

ChatGPT

The correct answer is:

d) masseter

The masseter muscle does not merge with the orbicularis oris muscle. The masseter is a muscle of mastication responsible for elevating the mandible, while the orbicularis oris is a muscle around the mouth that controls movements such as puckering the lips.

The other muscles listed—zygomaticus major, caninus, and mentalis—all have attachments to or influence the orbicularis oris, which helps in facial expressions and lip movements.

DeepSeek

The correct answer is:

d) masseter

The masseter muscle does not merge with the orbicularis oris muscle. The masseter is a powerful muscle of mastication that elevates the mandible and is located in the cheek area, but it is not involved in the movements of the lips or the orbicularis oris.

The other muscles listed do merge with the orbicularis oris:

a) Zygomaticus major: This muscle helps elevate the corners of the mouth and merges with the orbicularis oris.

b) Caninus (levator anguli oris): This muscle elevates the angle of the mouth and merges with the orbicularis oris.

c) Mentalis: This muscle elevates and protrudes the lower lip and merges with the orbicularis oris.

Thus, d) masseter is the correct answer.

94. Which of the following muscle is also known as depressor angularis?

1. caninus
2. risorius
3. **triangularis**
4. buccinator

ChatGPT

The correct answer is:

c) triangularis

The triangularis muscle is also known as the depressor anguli oris. It is responsible for depressing the corners of the mouth, contributing to facial expressions like frowning.

DeepSeek

The correct answer is:

c) triangularis

The triangularis muscle is also known as the depressor angularis oris. It is responsible for depressing the angle of the mouth (pulling it downward) and is located at the corners of the mouth.

The other options are incorrect:

a) Caninus (levator anguli oris): This muscle elevates the angle of the mouth, not depresses it.

b) Risorius: This muscle retracts the angle of the mouth laterally (as in smiling) but does not depress it.

d) Buccinator: This muscle compresses the cheeks and aids in chewing, but it is not involved in depressing the angle of the mouth.

Thus, c) triangularis is the correct answer.

95. Buccal corridor is the space between

1. lingual surface of upper teeth and corner of mouth
2. **buccal surface of upper teeth and corner of the mouth**
3. buccal surface of lower teeth and corner of the mouth
4. lingual surface of lower teeth and corner of the mouth

ChatGPT

The correct answer is:

b) buccal surface of upper teeth and corner of the mouth

The buccal corridor refers to the space between the buccal surface of the upper teeth and the corner of the mouth. This area is important in dental aesthetics, especially when smiling, as it helps determine the overall appearance of the smile.

DeepSeek

The correct answer is:

b) buccal surface of upper teeth and corner of the mouth

The buccal corridor refers to the space between the buccal (cheek) surface of the upper teeth and the corner of the mouth. It is an important aesthetic consideration in dentistry, as a narrow or wide buccal corridor can affect the appearance of a smile.

The other options are incorrect:

a) Lingual surface of upper teeth and corner of the mouth: This describes the space on the tongue side of the upper teeth, not the buccal corridor.

c) Buccal surface of lower teeth and corner of the mouth: This refers to the lower teeth, not the upper teeth.

d) Lingual surface of lower teeth and corner of the mouth: This describes the space on the tongue side of the lower teeth, not the buccal corridor.

Thus, b) buccal surface of upper teeth and corner of the mouth is the correct answer.

96. The selective grinding done in the mouth according to articulating paper marks usually results in

1. perfect balanced occlusion
2. **decreased amount of error in the occlusion**
3. increased amount of error in the occlusion
4. increased the retention of the denture

ChatGPT

The correct answer is:

**b) decreased amount of error in the occlusion**

Selective grinding done in the mouth, according to articulating paper marks, is used to adjust the occlusion and reduce any interferences. It helps in refining the occlusal contacts, which leads to a **decreased amount of error in the occlusion** and ensures better functional alignment of the teeth. This process improves the patient's comfort and the overall performance of the denture.

DeepSeek

The correct answer is:

b) decreased amount of error in the occlusion

Selective grinding done in the mouth according to articulating paper marks helps refine the occlusion by eliminating high spots and interferences. This process reduces errors in the occlusion, leading to a more balanced and harmonious bite.

The other options are incorrect:

a) Perfect balanced occlusion: While selective grinding improves occlusion, achieving a "perfect" balanced occlusion is difficult and not guaranteed.

c) Increased amount of error in the occlusion: This is incorrect, as selective grinding aims to reduce errors, not increase them.

d) Increased retention of the denture: Selective grinding primarily addresses occlusion, not denture retention.

Thus, b) decreased amount of error in the occlusion is the correct answer.

97. The errors in occlusion should be eliminated

1. in the mouth of the patient
2. **on the articulator**
3. without use of the articulator
4. by the patient himself

ChatGPT

The correct answer is:

b) on the articulator

Errors in occlusion should ideally be eliminated on the articulator before placing the denture in the patient's mouth. The articulator simulates jaw movements, allowing the dentist to make precise adjustments and corrections to the occlusion, ensuring a better fit and function when the denture is finally placed in the patient's mouth.

DeepSeek

The correct answer is:

a) in the mouth of the patient

Errors in occlusion should be eliminated in the mouth of the patient because the articulator, while useful, cannot fully replicate the complex movements and dynamics of the patient's jaw. Final adjustments and refinements must be made directly in the patient's mouth to ensure proper function, comfort, and balance.

The other options are incorrect:

b) On the articulator: While initial adjustments can be made on the articulator, final corrections must be done in the patient's mouth.

c) Without use of the articulator: The articulator is a valuable tool for preliminary adjustments, so it should not be completely avoided.

d) By the patient himself: This is not appropriate, as occlusion adjustments require professional expertise.

Thus, a) in the mouth of the patient is the correct answer.

98. After the centric occlusion has been perfected which of the following cusps should not be shortened

1. **lingual cusps of maxillary and buccal cusps of mandibular teeth**
2. lingual cusps of maxillary and lingual cusps of mandibular teeth
3. buccal cusps of maxillary and buccal cusps of the mandibular teeth
4. buccal cusps of the maxillary and lingual cusps of the mandibular teeth

ChatGPT

The correct answer is:

a) lingual cusps of maxillary and buccal cusps of mandibular teeth

Once centric occlusion has been perfected, it is important to maintain the integrity of the lingual cusps of the maxillary teeth and the buccal cusps of the mandibular teeth. These cusps are critical for maintaining proper occlusion and supporting the vertical dimension. Shortening these cusps could disrupt the balance and functional relationship between the upper and lower teeth.

DeepSeek

The correct answer is:

a) lingual cusps of maxillary and buccal cusps of mandibular teeth

After perfecting centric occlusion, the lingual cusps of the maxillary teeth and the buccal cusps of the mandibular teeth should not be shortened. These cusps are considered supporting cusps (also called stamp cusps) and play a critical role in maintaining vertical dimension and stability of the occlusion. Shortening them can lead to a loss of occlusal support and improper function.

The other options are incorrect:

b) Lingual cusps of maxillary and lingual cusps of mandibular teeth: The lingual cusps of the mandibular teeth are not supporting cusps and can be adjusted if necessary.

c) Buccal cusps of maxillary and buccal cusps of the mandibular teeth: The buccal cusps of the maxillary teeth are not supporting cusps and can be adjusted.

d) Buccal cusps of the maxillary and lingual cusps of the mandibular teeth: Neither of these are supporting cusps and can be adjusted if needed.

Thus, a) lingual cusps of maxillary and buccal cusps of mandibular teeth is the correct answer.

99. Which of the following should not be used for the correction of the occlusal errors?

1. rubber wheels
2. acetate strips
3. articulating paper
4. **Carborundum paste**

ChatGPT

The correct answer is:

**b) acetate strips**

**Acetate strips** should not be used for the correction of occlusal errors. They are typically used for polishing or finishing, not for correcting occlusal discrepancies.

The other options—**rubber wheels**, **articulating paper**, and **carborundum paste**—are tools that can be used for adjusting and refining occlusal contacts, either by grinding or marking occlusal interferences.

DeepSeek

The correct answer is:

d) Carborundum paste

Carborundum paste should not be used for the correction of occlusal errors. It is an abrasive material that can cause excessive and irreversible removal of tooth structure, leading to improper occlusion and potential damage to the teeth.

The other options are appropriate for correcting occlusal errors:

a) Rubber wheels: These can be used for polishing and minor adjustments.

b) Acetate strips: These are used for fine adjustments and polishing of occlusal surfaces.

c) Articulating paper: This is used to identify high spots and occlusal interferences.

Thus, d) Carborundum paste is the correct answer.

100. Is the forward shifting of mandibular denture base from excessive loading from posterior occlusion results in tissue ulceration in

1. posterior lingual flange
2. posterior buccal flange
3. anterior buccal flange
4. **anterior lingual flange**

ChatGPT

The correct answer is:

a) posterior lingual flange

Excessive loading on the posterior occlusion of a mandibular denture can cause a forward shifting of the denture base. This can lead to tissue ulceration on the posterior lingual flange due to the pressure exerted on that area. The posterior lingual area is particularly vulnerable to such shifting because it is where the denture may lift or move forward, leading to discomfort and potential tissue irritation.

DeepSeek

The correct answer is:

d) anterior lingual flange

When the mandibular denture base shifts forward due to excessive loading from posterior occlusion, the anterior lingual flange of the denture can press against the lingual alveolar ridge, leading to tissue ulceration in this area. This occurs because the forward movement causes the anterior lingual flange to dig into the soft tissues.

The other options are incorrect:

a) Posterior lingual flange: This area is less likely to be affected by forward shifting.

b) Posterior buccal flange: This area is not typically involved in tissue ulceration due to forward shifting.

c) Anterior buccal flange: This area is less likely to be affected compared to the anterior lingual flange.

Thus, d) anterior lingual flange is the correct answer.
